# Supplementary material for: Drought-induced transposon expression reveals complex drought response mechanisms in Brassica napus
Source: Front Plant Sci. 2025 Jul 23;16:1614169. doi: 10.3389/fpls.2025.1614169 (PMC12325175; doi:10.3389/fpls.2025.1614169)
Supplement: Supplementary file 3 [file Table1.xlsx]

## Sheet: Sheet1
Supplementary Table S1 Pfam domains associated with transposases from InterProScan
Accession	Name	Description	Source Database
PF01710	Transposase	Transposase proteins are necessary for efficient DNA transposition. This family includes insertion sequences from Synechocystis PCC 6803 three of which are characterised as homologous to bacterial IS5- and IS4- and to several members of the IS630-Tc1-mariner superfamily [[cite:PUB00001874]].	PFAM
PF13737	Transposase DDE domain	Transposase proteins are necessary for efficient DNA transposition. This domain is a member of the DDE superfamily, which contain three carboxylate residues that are believed to be responsible for coordinating metal ions needed for catalysis.	PFAM
PF01527	Transposase	Transposase proteins are necessary for efficient DNA transposition. This family consists of various E. coli insertion elements and other bacterial transposases some of which are members of the IS3 family.	PFAM
PF01610	Transposase	Transposase proteins are necessary for efficient DNA transposition. Contains transposases for IS204 (Swiss:Q50911) [[cite:PUB00003859]], IS1001 (Swiss:Q06126) [[cite:PUB00002211]], IS1096 (Swiss:Q50440) [[cite:PUB00002158]] and IS1165 Swiss:Q48788 [[cite:PUB00004585]].	PFAM
PF04986	Putative transposase	Transposases are needed for efficient transposition of the insertion sequence or transposon DNA. This family includes transposases IS1294 and IS801. This is a rolling-circle transposase.	PFAM
PF03050	Transposase IS66 family	Transposase proteins are necessary for efficient DNA transposition. This family includes IS66 from Agrobacterium tumefaciens [[cite:PUB00007470]].	PFAM
PF13005	zinc-finger binding domain of transposase IS66	This is a zinc-finger region of the N-terminus of the insertion element IS66 transposase.	PFAM
PF01548	Transposase	Transposase proteins are necessary for efficient DNA transposition. This family includes an amino-terminal region of the pilin gene inverting protein (PIVML) and of members of the IS111A/IS1328/IS1533 family of transposases. The C-terminus is represented by family Pfam:PF02371.	PFAM
PF01526	Tn3 transposase DDE domain	This family includes transposases of Tn3, Tn21, Tn1721, Tn2501, Tn3926 transposons from E-coli. The specific binding of the Tn3 transposase to DNA has been demonstrated. Sequence analysis has suggested that the invariant triad of Asp689, Asp765, Glu895 (numbering as in Tn3) may correspond to the D-D-35-E motif previously implicated in the catalysis of numerous transposases [[cite:PUB00000555]].	PFAM
PF01609	Transposase DDE domain	Transposase proteins are necessary for efficient DNA transposition. This domain is a member of the DDE superfamily, which contain three carboxylate residues that are believed to be responsible for coordinating metal ions needed for catalysis. The catalytic activity of this enzyme involves DNA cleavage at a specific site followed by a strand transfer reaction [[cite:PUB00001489]]. This family cont…	PFAM
PF13007	Transposase C of IS166 homeodomain	This is a leucine-zipper-like or homeodomain-like region of transposase TnpC of insertion element IS66.	PFAM
PF21804	Transposase protein	This entry represents a family of transposase proteins. The structure prediction shows closest similarity to the TN5 transposase protein [[cite:PUB00027468]].	PFAM
PF14706	Transposase DNA-binding	This domain occurs at the C-terminus of transposases including E. coli tnpA (Swiss:Q46731). TnpA encodes a transposase and an inhibitor protein, the inhibitor only differs from the transposase by the absence of the N-terminal 55 amino acids, which includes most of this domain [[cite:PUB00006439]]. This domain consists of alpha helices and turns, and functions as a DNA-binding domain [[cite:PUB000…	PFAM
PF02914	Bacteriophage Mu transposase	This transposase is essential for integration, replication-transposition and excision of Bacteriophage Mu DNA. The crystal structure of the core domain of Mu transposase, MuA, exhibits that the first of two subdomains contains the active site and, despite very limited sequence homology, exhibits a striking similarity to the core domain of Human immunodeficiency virus 1 integrase. The enzymatic ac…	PFAM
PF20700	Mutator-like transposase	This is a transposase domain of the mutator superfamily [[cite:PUB00100103]].	PFAM
PF02281	Transposase Tn5 dimerisation domain	Transposons are mobile DNA sequences capable of replication and insertion into the chromosome. Typically transposons code for the transposase enzyme, which catalyses insertion, found between terminal inverted repeats. Tn5 has a unique method of self- regulation in which a truncated version of the transposase enzyme acts as an inhibitor [[cite:PUB00006439]]. The catalytic domain of the Tn5 transpo…	PFAM
PF10683	Hermes transposase DNA-binding domain	This domain confers specific DNA-binding on Hermes transposase [[cite:PUB00039784]].	PFAM
PF03400	IS1 transposase	Transposase proteins are necessary for efficient DNA transposition. This family represents bacterial IS1 transposases.	PFAM
PF13751	Transposase DDE domain	Transposase proteins are necessary for efficient DNA transposition. This domain is a member of the DDE superfamily, which contain three carboxylate residues that are believed to be responsible for coordinating metal ions needed for catalysis.	PFAM
PF13586	Transposase DDE domain	Transposase proteins are necessary for efficient DNA transposition. This domain is a member of the DDE superfamily, which contain three carboxylate residues that are believed to be responsible for coordinating metal ions needed for catalysis.	PFAM
PF12760	Transposase zinc-ribbon domain	This zinc binding domain is found in a range of transposase proteins such as ISSPO8, ISSOD11, ISRSSP2 etc. It is likely a zinc-binding beta ribbon domain that could bind the DNA.	PFAM
PF13612	Transposase DDE domain	Transposase proteins are necessary for efficient DNA transposition. This domain is a member of the DDE superfamily, which contains three carboxylate residues that are believed to be responsible for coordinating metal ions needed for catalysis. The catalytic activity of this enzyme involves DNA cleavage at a specific site followed by a strand transfer reaction [[cite:PUB00001489]].	PFAM
PF17906	HTH domain in Mos1 transposase	The N-terminal domain of the Mos1 Mariner transposase comprises two HTH domains [[cite:PUB00091573]]. This HTH domain binds in the DNA major groove to the transposons inverted repeats.	PFAM
PF22824	DNA transposase THAP9, C-terminal domain	This domain is found at the C-terminal of human DNA transposase THAP9 and similar proteins mainly from vertebrates. This domain is predicted to be mainly formed by alpha-helices.	PFAM
PF13701	Transposase DDE domain group 1	Transposase proteins are necessary for efficient DNA transposition. This domain is a member of the DDE superfamily, which contain three carboxylate residues that are believed to be responsible for coordinating metal ions needed for catalysis.	PFAM
PF18759	Plavaka transposase	A transposase with an RNaseH catalytic domain that often has a histone binding BAM/BAH domain at the C-terminus and is sometimes associated with TET/JBP family of dioxygenases in fungi [[cite:PUB00091141]].	PFAM
PF12762	ISXO2-like transposase domain	This domain probably functions as an integrase that is found in a wide variety of transposases, including ISXO2.	PFAM
PF01359	Transposase (partial DDE domain)	This family includes the mariner transposase [[cite:PUB00001294]].	PFAM
PF12784	PD-(D/E)XK nuclease family transposase	Members of this family belong to the PD-(D/E)XK nuclease superfamily [[cite:PUB00020736]]. These proteins are transposase proteins.	PFAM
PF01498	Transposase	Transposase proteins are necessary for efficient DNA transposition. This family includes the amino-terminal region of Tc1, Tc1A, Tc1B and Tc2B transposases of C.elegans. The region encompasses the specific DNA binding and second DNA recognition domains as well as an amino-terminal region of the catalytic domain of Tc3 as described in [[cite:PUB00001309]]. Tc3 is a member of the Tc1/mariner family…	PFAM
PF21517	Transposable element Tc3 transposase, HTH	Tc3 is transposase with a specific DNA-binding domain. It binds specifically to the terminal nucleotides of the TC3 inverted repeat and acts by making double strand breaks at the ends of TC3 element. It has two DNA-binding domains at the N-terminal, the first one represented in Pfam:PF11427 and the second one in this entry [[cite:PUB00031689]]. They both bind to the major groove on a single DNA o…	PFAM
PF12596	87kDa Transposase	This domain family is found in eukaryotes, and is typically between 78 and 110 amino acids in length. The family is found in association with Pfam:PF05485. There are two completely conserved residues (D and G) that may be functionally important. This family is an 87kDa transposase protein which catalyses both the precise and imprecise excision of a nonautonomous P transposable element.	PFAM
PF01797	Transposase IS200 like	Transposases are needed for efficient transposition of the insertion sequence or transposon DNA. This family includes transposases for IS200 from E. coli.	PFAM
PF00872	Transposase, Mutator family		PFAM
PF13542	Helix-turn-helix domain of transposase family ISL3		PFAM
PF14690	zinc-finger of transposase IS204/IS1001/IS1096/IS1165		PFAM
PF03004	Plant transposase (Ptta/En/Spm family)	Transposase proteins are necessary for efficient DNA transposition. This family includes various plant transposases from the Ptta and En/Spm families.	PFAM
PF11427	Tc3 transposase	Tc3 is transposase with a specific DNA-binding domain which contains three alpha-helices, two of which form a helix-turn-helix motif which makes four base-specific contacts with the major groove. The N-terminus makes contacts with the minor groove. There is a base specific recognition between Tc3 and the transposon DNA. The DNA binding domain forms a dimer in which each monomer binds a separate t…	PFAM
PF18758	Kyakuja-Dileera-Zisupton transposase	A transposase family with an RNaseH catalytic domain, often fused to DNA binding domains such as SAP or cysteine cluster domains. KDZ transposases are widely present in fungi, metazoa, chlorophytes and haotpohytes. Fungal versions are often associated with a TET/JBP family of dioxygenases [[cite:PUB00091141],[cite:PUB00091142]].	PFAM
PF07282	Putative transposase DNA-binding domain	This putative domain is found at the C-terminus of a large number of transposase proteins. This domain contains four conserved cysteines suggestive of a zinc binding domain. Given the need for transposases to bind DNA as well as the large number of DNA-binding zinc fingers we hypothesise this domain is DNA-binding.	PFAM
PF02371	Transposase IS116/IS110/IS902 family	Transposases are needed for efficient transposition of the insertion sequence or transposon DNA. This family includes transposases for IS116, IS110 and IS902. This region is often found with Pfam:PF01548. The exact function of this region is uncertain. This family contains a HHH motif suggesting a DNA-binding function.	PFAM
PF13006	Insertion element 4 transposase N-terminal	This family represents the N-terminal region of proteins carrying the transposase enzyme, DDE_Tnp_1 (that was Transposase_11), Pfam:PF01609, at the C-terminus. The full-length members are Insertion Element 4, IS4. Within the collection of E.coli strains, ECOR, the number of IS4 elements varies from zero to 14, with an average of 5 copies/strain [[cite:PUB00056053]].	PFAM
PF05598	Transposase domain (DUF772)	This presumed domain is found at the N-terminus of many proteins found in transposons.	PFAM
PF07592	Rhodopirellula transposase DDE domain	These transposases are found in the planctomycete Rhodopirellula baltica, the cyanobacterium Nostoc, and the Gram-positive bacterium Streptomyces.	PFAM
PF13963	Transposase-associated domain		PFAM
PF21787	TNP-like, RNase H N-terminal domain	This entry represents the N-terminal segment of the RNase H domain from Drosophila Transposable element P transposase (TNP) and its homologue from human, THAP9. The catalytic RNase H domain in these proteins is interrupted by the GTP-binding insertion domain (GBD) [[cite:PUB00102717]].	PFAM
PF09299	Mu transposase, C-terminal	Members of this family are found in various prokaryotic integrases and transposases. They adopt a beta-barrel structure with Greek-key topology [[cite:PUB00007414]].	PFAM
PF21788	TNP-like, GTP-binding insertion domain	This entry represents a GTP-binding insertion domain (GBD) from Transposable element P transposase from Drosophila and its human homologue, THAP9 [[cite:PUB00102717]]. This domain is inserted in the RNaseH domain and adopts a mostly alpha-helical fold, similar to that in Hermes, Tn5 or RAG1 proteins. This domain is involved in protein-DNA interactions [[cite:PUB00102717]].	PFAM
PF03221	Tc5 transposase DNA-binding domain		PFAM
PF04236	Tc5 transposase C-terminal domain	This family corresponds to a C-terminal cysteine rich region that probably binds to a metal ion and could be DNA binding (pers. obs. A Bateman).	PFAM
PF22483	Mu transposase, C-terminal domain	Members of this family are found in various prokaryotic integrases and transposases. They adopt a beta-barrel structure with Greek-key topology according to [[cite:PUB00007414]] or an OB fold according to ECOD.	PFAM
PF01385	Probable transposase	This family includes IS891 [[cite:PUB00002091]], IS1136 [[cite:PUB00001825]] and IS1341 [[cite:PUB00001858]]. DUF1225, Pfam:PF06774, has now been merged into this family.	PFAM
PF14372	hAT-like transposase, RNase-H fold	This domain is part of an RNase-H fold section in a number of hAT-like transposases, such as protein DAYSLEEPER (At3g42170) from Arabidopsis [[cite:PUB00070967]]. Protein DAYSLEEPER is essential for plant development and can also regulate global gene expression [[cite:PUB00070969]]. This entry also includes some uncharacterised fungal proteins.	PFAM
PF02992	Transposase family tnp2	Transposase_21 proteins are present mostly in plants, with members horizontally transferred to Bifidobacterium breve (GI: 291457831). Both DUF1258 Pfam:PF06869 and Transposase_21 have conserved active site residues similar to RNase H-like proteins, which suggests that they are functional transposases (1).	PFAM
PF03108	MuDR family transposase	This region is found in plant proteins that are presumed to be the transposases for Mutator transposable elements [[cite:PUB00007520],[cite:PUB00007521]]. These transposons contain two ORFs. The molecular function of this region is unknown.	PFAM
PF13022	Helix-turn-helix of insertion element transposase	This is a family of largely phage proteins which are likely to be a helix-turn-helix insertion elements.	PFAM
PF04693	Archaeal putative transposase ISC1217		PFAM
PF04754	Putative transposase, YhgA-like	This family of putative transposases includes the YhgA sequence from Escherichia coli (Swiss:P31667) and several prokaryotic homologues.	PFAM
PF14319	Transposase zinc-binding domain	This domain is likely to be a zinc-binding domain. It is found at the N-terminus of transposases belonging to the IS91 family.	PFAM
PF03017	TNP1/EN/SPM transposase		PFAM
PF13340	Putative transposase of IS4/5 family (DUF4096)		PFAM
PF04937	Protein of unknown function (DUF 659)	Transposase-like protein with no known function.	PFAM
PF18717	CxC4 like cysteine cluster associated with KDZ transposases	A predicted Zinc chelating domain present N-terminal to the KDZ transposase domain [[cite:PUB00091141]].	PFAM
PF18866	CxC7 like cysteine cluster associated with KDZ transposases	A predicted Zinc chelating domain present N-terminal to the KDZ transposase domain [[cite:PUB00091141]].	PFAM
PF18718	CxC5 like cysteine cluster associated with KDZ transposases	A predicted Zinc chelating domain present N-terminal to the KDZ transposase domain [[cite:PUB00091141]].	PFAM
PF18803	CxC2 like cysteine cluster associated with KDZ transposases	A predicted Zinc chelating domain present N-terminal to the KDZ transposase domain [[cite:PUB00091141]].	PFAM
PF18802	CxC1 like cysteine cluster associated with KDZ transposases	A predicted Zinc chelating domain present N-terminal to the KDZ transposase domain [[cite:PUB00091141]].	PFAM
PF18804	CxC3 like cysteine cluster associated with KDZ transposases	A predicted Zinc chelating domain present N-terminal to the KDZ transposase domain [[cite:PUB00091141]].	PFAM
PF18721	CxC6 like cysteine cluster associated with KDZ transposases	A predicted Zinc chelating domain inserted into the core of the KDZ transposase domain [[cite:PUB00091141]].	PFAM
PF13613	Helix-turn-helix of DDE superfamily endonuclease	This domain is the probable DNA-binding region of transposase enzymes, necessary for efficient DNA transposition. Most of the members derive from the IS superfamily IS5 and rather fewer from IS4.	PFAM
PF01695	IstB-like ATP binding protein	This protein contains an ATP/GTP binding P-loop motif. It is found associated with IS21 family insertion sequences [[cite:PUB00001854]]. The function of this protein is unknown, but it may perform a transposase function [[cite:PUB00001737]].	PFAM
PF02316	Mu DNA-binding domain	This family consists of MuA-transposase and repressor protein CI. These proteins contain homologous DNA-binding domains at their N-termini which compete for the same DNA site within the Mu bacteriophage genome.	PFAM
PF08721	TnsA endonuclease C terminal	The Tn7 transposase is composed of proteins TnsA and TnsB. DNA breakage at the 5' end of the transposon is carried out by TnsA, and breakage and joining at the 3' end is carried out by TnsB. The C terminal domain of TnsA binds DNA.	PFAM
PF11426	Tn7 transposition regulator TnsC	TnsC is a molecular switch that regulates transposition and interacts with TnsA which is a component of the transposase. The two proteins interact via the residues 504-555 on TnsC. The TnsA/TnsC interaction is very important in Tn7 transposition [[cite:PUB00022719]].	PFAM
PF13011	leucine-zipper of insertion element IS481	This is the upstream region of the conjoined ORF AB of insertion element 481. The significance of IS481 in the detection of Bordetella pertussis is discussed in [[cite:PUB00069777]]. The B portion of the ORF AB carries the transposase activity in family rve, PFAM:PF00665.	PFAM
PF14294	Domain of unknown function (DUF4372)	This domain family is found in bacteria, and is approximately 80 amino acids in length. The family is found in association with Pfam:PF01609. There is a single completely conserved residue G that may be functionally important.	PFAM
PF00654	Voltage gated chloride channel	This family of ion channels contains 10 or 12 transmembrane helices. Each protein forms a single pore. It has been shown that some members of this family form homodimers. In terms of primary structure, they are unrelated to known cation channels or other types of anion channels. Three ClC subfamilies are found in animals. ClC-1 (Swiss:P35523) is involved in setting and restoring the resting membr…	PFAM
PF13333	Integrase core domain		PFAM
PF13817	IS66 C-terminal element		PFAM
PF05717	IS66 Orf2 like protein	This protein is found in insertion sequences related to IS66. The function of these proteins is uncertain, but they are probably essential for transposition [[cite:PUB00011506]].	PFAM
PF13683	Integrase core domain		PFAM
PF00665	Integrase core domain	Integrase mediates integration of a DNA copy of the viral genome into the host chromosome. Integrase is composed of three domains. The amino-terminal domain is a zinc binding domain Pfam:PF02022. This domain is the central catalytic domain. The carboxyl terminal domain that is a non-specific DNA binding domain Pfam:PF00552. The catalytic domain acts as an endonuclease when two nucleotides are rem…	PFAM
PF13936	Helix-turn-helix domain	This helix-turn-helix domain is often found in transferases and is likely to be DNA-binding.	PFAM
PF13276	HTH-like domain	This domain contains a predicted helix-turn-helix suggesting a DNA-binding function.	PFAM
PF05485	THAP domain	The THAP domain is a putative DNA-binding domain (DBD) and probably also binds a zinc ion. It features the conserved C2CH architecture (consensus sequence: Cys - 2-4 residues - Cys - 35-50 residues - Cys - 2 residues - His). Other universal features include the location of the domain at the N-termini of proteins, its size of about 90 residues, a C-terminal AVPTIF box and several other conserved r…	PFAM
PF13518	Helix-turn-helix domain	This helix-turn-helix domain is often found in transposases and is likely to be DNA-binding.	PFAM
PF13359	DDE superfamily endonuclease	This family of proteins are related to Pfam:PF00665 and are probably endonucleases of the DDE superfamily. Transposase proteins are necessary for efficient DNA transposition. This domain is a member of the DDE superfamily, which contain three carboxylate residues that are believed to be responsible for coordinating metal ions needed for catalysis. The catalytic activity of this enzyme involves DN…	PFAM
PF13546	DDE superfamily endonuclease	This family of proteins are related to Pfam:PF00665 and are probably endonucleases of the DDE superfamily. Transposase proteins are necessary for efficient DNA transposition. This domain is a member of the DDE superfamily, which contain three carboxylate residues that are believed to be responsible for coordinating metal ions needed for catalysis. The catalytic activity of this enzyme involves DN…	PFAM
PF13358	DDE superfamily endonuclease	This family of proteins are related to Pfam:PF00665 and are probably endonucleases of the DDE superfamily. Transposase proteins are necessary for efficient DNA transposition. This domain is a member of the DDE superfamily, which contain three carboxylate residues that are believed to be responsible for coordinating metal ions needed for catalysis. The catalytic activity of this enzyme involves DN…	PFAM
PF21860	Replitron, C-terminal domain	This entry represents a presumed domain found adjacent to the HUH endonuclease domain of the eukaryotic transposase encoded by Replitron, a fourth independent group of DNA transposons encoding HUH endonuclease that are found in genomes of green algae and plants, diverse stramenopiles including brown seaweeds and likely also cryptophytes and haptophytes, which suggests an ancient origin and broad …	PFAM
PF21859	Replitron, HUH endonuclease domain	This entry represents the Rep HUH endonuclease domain of the eukaryotic transposase encoded by replitrons, a fourth independent group of DNA transposons found in genomes of green algae and plants, diverse stramenopiles including brown seaweeds and likely also cryptophytes and haptophytes, which suggests an ancient origin and broad eukaryotic distribution. This domain contains motif I (SUTU), moti…	PFAM
PF08722	TnsA-like endonuclease N terminal	The Tn7 transposase is composed of proteins TnsA and TnsB. DNA breakage at the 5' end of the transposon is carried out by TnsA, and breakage and joining at the 3' end is carried out by TnsB. The N terminal domain of TnsA is catalytic [[cite:PUB00028468],[cite:PUB00066699]]. This domain is also found in Bacteriophage T4 gp4-like head completion protein whose nuclease activity is required for packa…	PFAM
PF12851	Oxygenase domain of the 2OGFeDO superfamily	A double-stranded beta helix (DSBH) fold domain of the 2-oxoglutarate (2OG)-Fe(II)-dependent dioxygenase (2OGFeDO) superfamily found in various eukaryotes, bacteria and bacteriophages [[cite:PUB00057265]]. Members of this family catalyze nucleic acid modifications, such as thymidine hydroxylation during base J synthesis in kinetoplastids [[cite:PUB00057266]], and the conversion of 5 methyl-cytosi…	PFAM
PF03184	DDE superfamily endonuclease	This family of proteins are related to Pfam:PF00665 and are probably endonucleases of the DDE superfamily. Transposase proteins are necessary for efficient DNA transposition. This domain is a member of the DDE superfamily, which contain three carboxylate residues that are believed to be responsible for coordinating metal ions needed for catalysis. The catalytic activity of this enzyme involves DN…	PFAM
PF13017	piRNA pathway germ-plasm component	Maelstrom is a germ-plasm component protein, that is shown to be functionally involved in the piRNA pathway. It is conserved throughout Eukaryota, though it appears to have been lost from all examined teleost fish species. The domain architecture shows that it is coupled with several DNA- and RNA- related domains such as HMG box, SR-25-like and HDAC_interact domains. Sequence analysis and fold re…	PFAM
