# Supplementary material for: Drought-induced transposon expression reveals complex drought response mechanisms in Brassica napus
Source: Front Plant Sci. 2025 Jul 23;16:1614169. doi: 10.3389/fpls.2025.1614169 (PMC12325175; doi:10.3389/fpls.2025.1614169)
Supplement: Supplementary file 5 [file Table3.xlsx]

## Sheet: Sheet1
Supplementary Table S3 Pfam domain prediction of protein-coding intergenic TE transcripts
TE transcript	Homologous known proteins/domains	Pfam Accession	Predicted protein length (aa)
MSTRG.106819.1	60KD_IMP	PF02096.15	41
MSTRG.104297.1	7tm_3	PF00003.17	60
MSTRG.100050.1	A2L_zn_ribbon	PF08792.5	26
MSTRG.66594.1	AA_permease_C	PF13906.1	25
MSTRG.60499.1	AAA_13	PF13166.1	73
MSTRG.58575.1	AATase	PF07247.7	101
MSTRG.84855.1	ABA_WDS	PF02496.11	24
MSTRG.102084.1	ABC1	PF03109.11	60
MSTRG.81201.1	ABC1	PF03109.11	62
MSTRG.92953.1	ABC1	PF03109.11	60
MSTRG.26498.1	Abi	PF02517.11	44
MSTRG.84995.1	Abi	PF02517.11	48
MSTRG.51506.1	Aconitase	PF00330.15	36
MSTRG.124726.1	Acyl-CoA_dh_M	PF02770.14	23
MSTRG.9507.1	Adeno_E1B_19K	PF01691.11	68
MSTRG.125837.1	Adeno_E3_CR2	PF02439.10	19
MSTRG.59900.1	Adeno_E3B	PF03376.9	37
MSTRG.121264.1	Adeno_E4	PF05385.6	21
MSTRG.104483.1	Adeno_hexon_C	PF03678.9	49
MSTRG.59735.1	Adeno_knob	PF00541.12	89
MSTRG.119696.1	Adeno_PV	PF03910.8	53
MSTRG.104261.1	Adeno_VII	PF03228.9	82
MSTRG.4619.1	ADH_N_assoc	PF13823.1	9
MSTRG.78623.1	Adipogenin	PF15202.1	51
MSTRG.98223.1	Afi1	PF07792.7	47
MSTRG.43480.1	AFT	PF08731.6	51
MSTRG.82357.1	AFT	PF08731.6	51
MSTRG.66973.1	AgrB	PF04647.10	99
MSTRG.73137.1	Ala_racemase_C	PF00842.16	37
MSTRG.51245.1	ALMS_motif	PF15309.1	39
MSTRG.14248.1	Angiomotin_C	PF12240.3	50
MSTRG.38852.1	Angiomotin_C	PF12240.3	49
MSTRG.109970.1	AP4E_app_platf	PF14807.1	84
MSTRG.99699.1	ApbA_C	PF08546.6	39
MSTRG.81770.1	Apc15p	PF05841.6	36
MSTRG.102786.1	Apt1	PF10351.4	90
MSTRG.114692.1	ARA70	PF12489.3	50
MSTRG.1373.2	ArabFuran-catal	PF09206.6	26
MSTRG.44780.1	ASD1	PF08688.5	68
MSTRG.121298.1	ASFV_J13L	PF05568.6	39
MSTRG.81538.1	ASFV_p27	PF06556.6	67
MSTRG.100087.1	Asp	PF00026.18	48
MSTRG.67418.1	Asp	PF00026.18	28
MSTRG.107290.1	ATP13	PF12921.2	44
MSTRG.16828.1	ATP13	PF12921.2	53
MSTRG.73318.1	ATPase_gene1	PF09527.5	30
MSTRG.20202.1	ATP-synt_8	PF00895.15	34
MSTRG.67394.1	Atrophin-1	PF03154.10	45
MSTRG.67394.2	Atrophin-1	PF03154.10	45
MSTRG.89289.1	Atrophin-1	PF03154.10	24
MSTRG.89289.2	Atrophin-1	PF03154.10	24
MSTRG.89289.3	Atrophin-1	PF03154.10	24
MSTRG.53311.1	AUX_IAA	PF02309.11	21
MSTRG.40169.1	Auxin_repressed	PF05564.7	57
MSTRG.16481.1	Avl9	PF09794.4	43
MSTRG.13579.1	Bac_export_2	PF01312.14	56
MSTRG.56282.1	Bac_export_2	PF01312.14	69
MSTRG.102574.1	Bac_export_3	PF01313.14	19
MSTRG.74456.1	Bac_luciferase	PF00296.15	36
MSTRG.20355.1	Baculo_11_kDa	PF06143.6	26
MSTRG.58791.1	Baculo_11_kDa	PF06143.6	36
MSTRG.130144.1	Baculo_E56	PF04639.7	38
MSTRG.130338.1	Baculo_LEF-10	PF07206.6	30
MSTRG.128553.1	Baculo_VP91_N	PF08475.5	71
MSTRG.98397.1	BALF1	PF06861.6	37
MSTRG.125683.1	BatA	PF07584.6	48
MSTRG.76118.1	BatA	PF07584.6	53
MSTRG.83136.1	BatA	PF07584.6	48
MSTRG.88663.1	B-block_TFIIIC	PF04182.7	26
MSTRG.36840.1	BCHF	PF07284.6	42
MSTRG.90878.1	bHLH-MYC_N	PF14215.1	34
MSTRG.126158.1	Biotin_lipoyl	PF00364.17	25
MSTRG.68733.1	Blo-t-5	PF11642.3	31
MSTRG.93550.1	BPD_transp_1	PF00528.17	56
MSTRG.58400.1	Brr6_like_C_C	PF10104.4	53
MSTRG.68869.1	Bunya_RdRp	PF04196.7	90
MSTRG.114092.1	Bys1	PF04681.7	34
MSTRG.91967.1	Ca_hom_mod	PF14798.1	81
MSTRG.127859.1	Cadherin_pro	PF08758.6	52
MSTRG.76604.1	Cadherin_pro	PF08758.6	76
MSTRG.23428.1	CAMSAP_CKK	PF08683.6	38
MSTRG.84869.1	Cas_Cas02710	PF09670.5	45
MSTRG.46860.1	CBF	PF03914.12	67
MSTRG.18020.1	CbiQ	PF02361.11	65
MSTRG.106741.1	CBM_1	PF00734.13	21
MSTRG.115090.1	CCSMST1	PF15013.1	36
MSTRG.82433.1	CDC45	PF02724.9	68
MSTRG.80761.1	CDC73	PF05179.9	102
MSTRG.64728.1	Cellulose_synt	PF03552.9	95
MSTRG.88446.1	CENP-M	PF11111.3	68
MSTRG.65327.1	CENP-U	PF13097.1	112
MSTRG.61054.1	CGGC	PF08821.6	58
MSTRG.130975.1	Chitin_synth_2	PF03142.10	43
MSTRG.105985.1	Chordopox_A30L	PF06015.7	27
MSTRG.126068.1	Chromosome_seg	PF13889.1	31
MSTRG.65455.1	Claudin_3	PF06653.6	60
MSTRG.74355.1	Claudin_3	PF06653.6	61
MSTRG.1768.1	CM2	PF03021.9	41
MSTRG.84470.1	CNTF	PF01110.12	57
MSTRG.103619.1	CO_deh_flav_C	PF03450.12	34
MSTRG.129684.1	CO_deh_flav_C	PF03450.12	34
MSTRG.50819.1	CoA_binding_3	PF13727.1	47
MSTRG.114299.1	Colicin_C	PF12106.3	24
MSTRG.118647.1	Colicin_C	PF12106.3	26
MSTRG.124692.1	Colicin_Ia	PF11504.3	23
MSTRG.31025.1	Colipase-like	PF15083.1	37
MSTRG.81470.1	Connexin_CCC	PF10582.4	24
MSTRG.126248.1	COX5A	PF02284.11	55
MSTRG.92125.1	COX5B	PF01215.14	24
MSTRG.82856.1	CRAL_TRIO_2	PF13716.1	45
MSTRG.87193.1	CRCB	PF02537.10	39
MSTRG.9665.1	CRS1_YhbY	PF01985.16	39
MSTRG.18984.1	Cu_bind_like	PF02298.12	55
MSTRG.85402.1	Cyclin	PF08613.6	33
MSTRG.113155.1	Cyclin_C	PF02984.14	27
MSTRG.125159.1	Cyclin_C	PF02984.14	37
MSTRG.106557.1	Cyclophil_like	PF04126.8	27
MSTRG.3635.1	Cyclophil_like	PF04126.8	27
MSTRG.126413.1	Cytadhesin_P30	PF07271.6	70
MSTRG.99605.1	Cytochrome-c551	PF10643.4	48
MSTRG.38226.1	Cytokin_check_N	PF10407.4	32
MSTRG.67343.1	Cytokin-bind	PF09265.5	100
MSTRG.120159.1	CZB	PF13682.1	18
MSTRG.107313.1	DAD	PF02109.11	48
MSTRG.28469.1	DAO	PF01266.19	62
MSTRG.71903.14	DASH_Dam1	PF08653.5	29
MSTRG.119165.1	DASH_Duo1	PF08651.5	24
MSTRG.1373.1	DASH_Spc19	PF08287.6	31
MSTRG.18819.1	DASH_Spc19	PF08287.6	31
MSTRG.60237.1	DASH_Spc19	PF08287.6	31
MSTRG.77896.1	DBD_Tnp_Mut	PF03108.10	65
MSTRG.87056.1	DBD_Tnp_Mut	PF03108.10	65
MSTRG.89263.1	DBD_Tnp_Mut	PF03108.10	65
MSTRG.89657.1	DBD_Tnp_Mut	PF03108.10	19
MSTRG.4294.1	DDE_Tnp_1	PF01609.16	67
MSTRG.62837.1	DDE_Tnp_1	PF01609.16	112
MSTRG.126254.1	DDE_Tnp_IS66_C	PF13817.1	17
MSTRG.132111.1	DDE_Tnp_IS66_C	PF13817.1	17
MSTRG.89987.1	DEC-1_C	PF04626.8	46
MSTRG.98492.1	Dicty_REP	PF05086.7	81
MSTRG.29854.1	Dimer_Tnp_hAT	PF05699.9	85
MSTRG.99617.1	DIRP	PF06584.8	48
MSTRG.40788.3	DLIC	PF05783.6	68
MSTRG.82778.1	DLIC	PF05783.6	70
MSTRG.129883.1	DltD_M	PF04918.7	66
MSTRG.20752.1	DNA_pol3_a_NII	PF11490.3	71
MSTRG.120525.1	DNA_pol3_delta	PF06144.8	47
MSTRG.80848.1	DNA_pol3_delta	PF06144.8	47
MSTRG.113428.1	DndB	PF14072.1	88
MSTRG.130543.1	DPCD	PF14913.1	37
MSTRG.9928.1	DRMBL	PF07522.9	62
MSTRG.55979.1	DsbC	PF11412.3	37
MSTRG.123206.1	DsrD	PF08679.6	20
MSTRG.8385.1	DUF1012	PF06241.7	51
MSTRG.52534.1	DUF1119	PF06550.6	34
MSTRG.4761.1	DUF1148	PF06618.6	58
MSTRG.61409.1	DUF1199	PF06712.6	38
MSTRG.49986.1	DUF1218	PF06749.7	44
MSTRG.116294.1	DUF1230	PF06799.6	63
MSTRG.106482.1	DUF1253	PF06862.7	92
MSTRG.14613.1	DUF1269	PF06897.7	23
MSTRG.123121.1	DUF1279	PF06916.8	59
MSTRG.43522.1	DUF1301	PF06979.7	72
MSTRG.17727.1	DUF1324	PF07038.6	24
MSTRG.64501.1	DUF1331	PF07048.6	21
MSTRG.111499.1	DUF1422	PF07226.6	54
MSTRG.116562.1	DUF1430	PF07242.6	52
MSTRG.120809.1	DUF1449	PF07290.6	58
MSTRG.116714.1	DUF1556	PF07590.6	38
MSTRG.59086.1	DUF1565	PF07602.6	47
MSTRG.66367.1	DUF1574	PF07611.6	49
MSTRG.52054.1	DUF1597	PF07642.6	44
MSTRG.89750.1	DUF1619	PF07773.6	73
MSTRG.87113.1	DUF1625	PF07787.7	69
MSTRG.9987.1	DUF1626	PF07788.6	28
MSTRG.66581.2	DUF1633	PF07794.6	140
MSTRG.56996.1	DUF1673	PF07895.6	109
MSTRG.93768.1	DUF1682	PF07946.9	93
MSTRG.120562.1	DUF1700	PF08006.6	72
MSTRG.131667.1	DUF1726	PF08351.6	54
MSTRG.122272.1	DUF1748	PF08520.5	38
MSTRG.125921.1	DUF1770	PF08589.5	38
MSTRG.99231.1	DUF1777	PF08648.7	95
MSTRG.131575.1	DUF1796	PF08795.5	35
MSTRG.60651.1	DUF1797	PF08796.5	34
MSTRG.118426.1	DUF1811	PF08838.5	51
MSTRG.64918.1	DUF1815	PF08844.5	33
MSTRG.119595.1	DUF1817	PF08847.6	79
MSTRG.120895.1	DUF1874	PF08960.5	57
MSTRG.40505.1	DUF1924	PF09086.6	23
MSTRG.99920.2	DUF1925	PF09094.6	50
MSTRG.107486.1	DUF1974	PF09317.6	33
MSTRG.73024.1	DUF1974	PF09317.6	17
MSTRG.124886.1	DUF1985	PF09331.6	38
MSTRG.90074.1	DUF1985	PF09331.6	38
MSTRG.68593.1	DUF2109	PF09882.4	47
MSTRG.122507.1	DUF2155	PF09923.4	54
MSTRG.100426.1	DUF2158	PF09926.4	31
MSTRG.50913.1	DUF2161	PF09929.4	67
MSTRG.127623.1	DUF2178	PF09946.4	67
MSTRG.102756.1	DUF2207	PF09972.4	86
MSTRG.99739.1	DUF2208	PF09973.4	35
MSTRG.100438.1	DUF2240	PF09999.4	28
MSTRG.73021.1	DUF2240	PF09999.4	28
MSTRG.46888.1	DUF2306	PF10067.4	73
MSTRG.45035.1	DUF2325	PF10087.4	46
MSTRG.80471.1	DUF2360	PF10152.4	62
MSTRG.70148.1	DUF2373	PF10180.4	58
MSTRG.122994.1	DUF2434	PF10361.4	42
MSTRG.71483.1	DUF2486	PF10667.4	85
MSTRG.126894.1	DUF2489	PF10675.4	65
MSTRG.80758.1	DUF2501	PF10696.4	28
MSTRG.57447.1	DUF2512	PF10710.4	51
MSTRG.58432.1	DUF2517	PF10725.4	33
MSTRG.121207.1	DUF2621	PF11084.3	39
MSTRG.27757.1	DUF2621	PF11084.3	39
MSTRG.94623.1	DUF2624	PF11116.3	27
MSTRG.102461.1	DUF2638	PF10937.3	61
MSTRG.81566.1	DUF2702	PF10863.3	55
MSTRG.25138.1	DUF2713	PF10897.3	43
MSTRG.120608.1	DUF2721	PF11026.3	75
MSTRG.131218.1	DUF2749	PF10907.3	28
MSTRG.92562.1	DUF2794	PF10984.3	37
MSTRG.28647.1	DUF2852	PF11014.3	63
MSTRG.34291.2	DUF287	PF03384.9	55
MSTRG.5933.1	DUF2946	PF11162.3	62
MSTRG.131144.1	DUF295	PF03478.13	12
MSTRG.91672.1	DUF2956	PF11169.3	69
MSTRG.73336.1	DUF3039	PF11238.3	20
MSTRG.97541.1	DUF3040	PF11239.3	29
MSTRG.127078.1	DUF3081	PF11280.3	28
MSTRG.127985.1	DUF3094	PF11293.3	34
MSTRG.90076.1	DUF3094	PF11293.3	17
MSTRG.120570.1	DUF3113	PF11310.3	30
MSTRG.127117.2	DUF3113	PF11310.3	29
MSTRG.3665.1	DUF3139	PF11337.3	55
MSTRG.69105.1	DUF3198	PF11433.3	22
MSTRG.57438.1	DUF321	PF03778.8	20
MSTRG.59560.1	DUF321	PF03778.8	10
MSTRG.77230.1	DUF3240	PF11582.3	50
MSTRG.20819.1	DUF3262	PF11660.3	30
MSTRG.24849.1	DUF3262	PF11660.3	30
MSTRG.40107.1	DUF3278	PF11683.3	89
MSTRG.71203.1	DUF3285	PF11688.3	32
MSTRG.100424.1	DUF3292	PF11696.3	57
MSTRG.30965.1	DUF3292	PF11696.3	53
MSTRG.56636.1	DUF330	PF03886.8	36
MSTRG.102519.1	DUF3307	PF11750.3	41
MSTRG.96608.1	DUF3311	PF11755.3	31
MSTRG.106732.1	DUF3329	PF11808.3	49
MSTRG.46093.1	DUF3329	PF11808.3	71
MSTRG.93345.1	DUF3329	PF11808.3	74
MSTRG.20040.1	DUF3392	PF11872.3	24
MSTRG.10928.1	DUF3398	PF11878.3	36
MSTRG.35149.1	DUF3402	PF11882.3	44
MSTRG.130408.1	DUF3411	PF11891.3	64
MSTRG.86593.1	DUF3461	PF11944.3	55
MSTRG.48371.1	DUF3487	PF11990.3	56
MSTRG.47011.1	DUF3510	PF12022.3	49
MSTRG.99995.1	DUF3521	PF12035.3	13
MSTRG.27054.1	DUF3529	PF12046.3	34
MSTRG.31245.1	DUF3538	PF12057.3	48
MSTRG.121692.2	DUF3542	PF12061.3	73
MSTRG.125098.1	DUF3575	PF12099.3	36
MSTRG.6089.1	DUF3608	PF12257.3	53
MSTRG.91586.2	DUF3619	PF12279.3	51
MSTRG.121564.1	DUF3636	PF12331.3	27
MSTRG.19073.1	DUF3752	PF12572.3	63
MSTRG.76358.1	DUF3753	PF12575.3	25
MSTRG.123670.1	DUF3792	PF12670.2	48
MSTRG.63754.1	DUF3816	PF12822.2	82
MSTRG.126781.1	DUF3845	PF12956.2	40
MSTRG.93819.1	DUF3884	PF13024.1	35
MSTRG.87682.1	DUF3916	PF13079.1	48
MSTRG.1894.1	DUF3930	PF13067.1	18
MSTRG.34573.1	DUF3953	PF13129.1	18
MSTRG.86009.1	DUF3959	PF13105.1	46
MSTRG.26542.1	DUF3969	PF13108.1	36
MSTRG.1861.4	DUF3974	PF13120.1	61
MSTRG.23706.1	DUF3996	PF13161.1	48
MSTRG.90984.1	DUF4018	PF13210.1	100
MSTRG.126951.1	DUF4064	PF13273.1	34
MSTRG.101040.1	DUF4080	PF13311.1	79
MSTRG.125796.1	DUF4094	PF13334.1	24
MSTRG.11488.1	DUF4100	PF13352.1	31
MSTRG.112496.1	DUF4131	PF13567.1	63
MSTRG.122499.1	DUF4131	PF13567.1	42
MSTRG.5985.1	DUF4160	PF13711.1	28
MSTRG.100505.1	DUF4216	PF13952.1	72
MSTRG.106483.1	DUF4216	PF13952.1	66
MSTRG.114410.2	DUF4216	PF13952.1	59
MSTRG.115725.15	DUF4216	PF13952.1	58
MSTRG.115725.17	DUF4216	PF13952.1	57
MSTRG.119619.2	DUF4216	PF13952.1	74
MSTRG.120239.1	DUF4216	PF13952.1	16
MSTRG.55687.1	DUF4216	PF13952.1	59
MSTRG.56837.1	DUF4216	PF13952.1	31
MSTRG.63463.1	DUF4216	PF13952.1	43
MSTRG.66083.1	DUF4216	PF13952.1	59
MSTRG.74821.4	DUF4216	PF13952.1	62
MSTRG.79288.1	DUF4216	PF13952.1	72
MSTRG.44096.1	DUF4217	PF13959.1	28
MSTRG.103936.1	DUF4218	PF13960.1	88
MSTRG.110163.1	DUF4218	PF13960.1	122
MSTRG.115725.16	DUF4218	PF13960.1	126
MSTRG.125222.1	DUF4218	PF13960.1	121
MSTRG.129674.1	DUF4218	PF13960.1	126
MSTRG.131663.7	DUF4218	PF13960.1	126
MSTRG.45876.3	DUF4218	PF13960.1	127
MSTRG.56036.1	DUF4218	PF13960.1	122
MSTRG.56501.1	DUF4218	PF13960.1	126
MSTRG.65919.1	DUF4218	PF13960.1	101
MSTRG.80875.1	DUF4218	PF13960.1	85
MSTRG.107395.1	DUF4220	PF13968.1	100
MSTRG.66664.4	DUF4229	PF14012.1	40
MSTRG.40554.1	DUF4234	PF14018.1	60
MSTRG.80339.1	DUF4242	PF14026.1	31
MSTRG.94090.1	DUF4245	PF14030.1	43
MSTRG.115089.1	DUF4283	PF14111.1	140
MSTRG.118524.1	DUF4283	PF14111.1	131
MSTRG.120881.1	DUF4283	PF14111.1	143
MSTRG.128749.1	DUF4283	PF14111.1	139
MSTRG.129353.1	DUF4283	PF14111.1	129
MSTRG.131212.1	DUF4283	PF14111.1	107
MSTRG.68843.1	DUF4292	PF14125.1	57
MSTRG.72343.1	DUF4292	PF14125.1	58
MSTRG.85020.1	DUF4316	PF14195.1	44
MSTRG.118982.1	DUF4371	PF14291.1	130
MSTRG.88731.1	DUF4389	PF14333.1	50
MSTRG.47545.1	DUF4406	PF14359.1	42
MSTRG.92975.1	DUF4407	PF14362.1	123
MSTRG.11591.1	DUF4413	PF14372.1	62
MSTRG.119040.1	DUF4432	PF14486.1	49
MSTRG.5270.1	DUF4439	PF14530.1	37
MSTRG.105585.1	DUF4446	PF14584.1	51
MSTRG.91586.1	DUF4446	PF14584.1	51
MSTRG.30187.1	DUF4452	PF14618.1	47
MSTRG.10241.1	DUF4466	PF14725.1	31
MSTRG.120135.1	DUF4485	PF14846.1	21
MSTRG.82539.1	DUF4485	PF14846.1	21
MSTRG.131203.1	DUF4500	PF14937.1	67
MSTRG.13282.1	DUF4504	PF14953.1	99
MSTRG.112423.1	DUF4519	PF15012.1	37
MSTRG.16469.1	DUF4519	PF15012.1	22
MSTRG.56224.1	DUF4524	PF15025.1	91
MSTRG.62019.1	DUF4534	PF15049.1	52
MSTRG.129922.1	DUF4540	PF15073.1	48
MSTRG.4902.1	DUF4573	PF15140.1	91
MSTRG.9802.1	DUF4573	PF15140.1	131
MSTRG.100654.1	DUF4583	PF15190.1	23
MSTRG.27318.1	DUF4633	PF15464.1	29
MSTRG.88452.1	DUF4658	PF15555.1	68
MSTRG.98399.1	DUF497	PF04365.8	42
MSTRG.45079.1	DUF543	PF04418.7	28
MSTRG.122932.1	DUF581	PF04570.9	23
MSTRG.116071.1	DUF645	PF04875.7	26
MSTRG.119600.1	DUF645	PF04875.7	31
MSTRG.42257.1	DUF645	PF04875.7	31
MSTRG.128981.1	DUF728	PF05304.7	60
MSTRG.125259.1	DUF730	PF05325.6	64
MSTRG.79336.1	DUF730	PF05325.6	60
MSTRG.34608.1	DUF760	PF05542.6	33
MSTRG.126986.1	DUF809	PF05663.6	47
MSTRG.12168.1	DUF822	PF05687.8	24
MSTRG.107817.1	DUF843	PF05814.6	32
MSTRG.109616.1	DUF846	PF05832.7	70
MSTRG.61775.1	DUF86	PF01934.12	32
MSTRG.69221.1	DUF905	PF06006.7	25
MSTRG.103518.1	DUF908	PF06012.7	98
MSTRG.14246.1	DUF912	PF06024.7	39
MSTRG.26277.1	DUF918	PF06033.6	64
MSTRG.83512.1	DUF971	PF06155.7	47
MSTRG.92315.1	DUF997	PF06196.7	49
MSTRG.99060.1	DUF997	PF06196.7	49
MSTRG.75390.1	DUSP	PF06337.7	45
MSTRG.110449.1	Dynein_light	PF01221.13	26
MSTRG.119745.1	EAF	PF09816.4	18
MSTRG.21670.7	Eaf7	PF07904.8	27
MSTRG.110458.1	EF-hand_like	PF09279.6	33
MSTRG.117462.1	eIF_4G1	PF12152.3	45
MSTRG.21740.1	eIF3g	PF12353.3	32
MSTRG.63143.1	ELF	PF03317.8	86
MSTRG.72684.1	Elf1	PF05129.8	29
MSTRG.114053.3	End_beta_propel	PF12217.3	54
MSTRG.20003.1	End_tail_spike	PF12219.3	47
MSTRG.20012.1	End_tail_spike	PF12219.3	46
MSTRG.36172.1	End_tail_spike	PF12219.3	52
MSTRG.46986.1	Enterotoxin_HS1	PF08090.6	12
MSTRG.68478.1	EphA2_TM	PF14575.1	28
MSTRG.75594.1	Equine_IAV_S2	PF06502.6	23
MSTRG.29053.1	ESR1_C	PF12743.2	10
MSTRG.52475.1	ESR1_C	PF12743.2	10
MSTRG.88653.1	EST1	PF10374.4	98
MSTRG.88653.2	EST1	PF10374.4	99
MSTRG.88653.3	EST1	PF10374.4	99
MSTRG.131769.1	EST1_DNA_bind	PF10373.4	86
MSTRG.131769.2	EST1_DNA_bind	PF10373.4	86
MSTRG.121856.3	Evr1_Alr	PF04777.8	19
MSTRG.15183.1	Exo_endo_phos	PF03372.18	55
MSTRG.48116.1	Exo_endo_phos	PF03372.18	249
MSTRG.86599.1	Exo_endo_phos	PF03372.18	248
MSTRG.9812.1	Exo_endo_phos	PF03372.18	249
MSTRG.61865.1	Extensin_2	PF04554.8	58
MSTRG.82637.1	FA_FANCE	PF11510.3	62
MSTRG.33784.1	Fae	PF08714.6	50
MSTRG.125947.1	FANCI_S1	PF14675.1	27
MSTRG.1824.1	F-box	PF00646.28	26
MSTRG.101417.1	F-box-like_2	PF13013.1	42
MSTRG.3262.1	FDC-SP	PF15215.1	22
MSTRG.1970.1	FERM_C	PF09380.5	38
MSTRG.130427.1	Ferritin-like	PF12902.2	18
MSTRG.16520.1	Fib_alpha	PF08702.5	92
MSTRG.106804.1	Fijivirus_P9-2	PF06837.6	65
MSTRG.125258.1	Fijivirus_P9-2	PF06837.6	67
MSTRG.28005.1	Fmp27	PF10344.4	39
MSTRG.75759.1	FNIP_M	PF14637.1	55
MSTRG.120596.1	Folliculin	PF11704.3	79
MSTRG.64070.1	Form-deh_trans	PF09163.6	12
MSTRG.21977.1	FPL	PF09758.4	50
MSTRG.125073.1	FTCD	PF02971.9	67
MSTRG.83093.1	Fucose_iso_N2	PF07882.7	41
MSTRG.115822.1	Fun_ATP-synt_8	PF05933.8	22
MSTRG.1150.1	FWWh	PF14922.1	55
MSTRG.65458.1	Fz	PF01392.17	83
MSTRG.65866.1	G-7-MTase	PF12803.2	112
MSTRG.4241.3	gag_pre-integrs	PF13976.1	47
MSTRG.83900.1	GARS_C	PF02843.11	35
MSTRG.129167.1	Gcd10p	PF04189.8	38
MSTRG.4501.1	Gemini_AL1_M	PF08283.6	60
MSTRG.118630.1	GET2	PF08690.5	100
MSTRG.127630.1	GET2	PF08690.5	70
MSTRG.30026.1	GET2	PF08690.5	43
MSTRG.88420.5	Git3_C	PF11970.3	36
MSTRG.95575.1	Glyco_hydro_46	PF01374.13	67
MSTRG.38346.1	Glyco_hydro_65C	PF03633.10	37
MSTRG.84772.1	Glyco_hydro_65C	PF03633.10	37
MSTRG.118284.1	Glycos_transf_4	PF00953.16	30
MSTRG.54019.1	Glycos_transf_4	PF00953.16	70
MSTRG.56947.1	Got1	PF04178.7	41
MSTRG.113852.1	GP41	PF00517.12	47
MSTRG.91045.1	GP41	PF00517.12	49
MSTRG.81867.1	Gp49	PF05973.9	31
MSTRG.24733.1	GRDA	PF04723.9	27
MSTRG.118117.1	GSH_synthase	PF03199.10	52
MSTRG.4367.1	GxGYxYP	PF14323.1	27
MSTRG.102588.1	HATPase_c	PF02518.21	34
MSTRG.108728.1	HbrB	PF08539.6	71
MSTRG.130570.1	HDNR	PF15115.1	31
MSTRG.90624.1	Helitron_like_N	PF14214.1	45
MSTRG.39282.1	Hep_core_N	PF08290.6	9
MSTRG.128196.1	Herpes_capsid	PF06112.6	72
MSTRG.73962.1	Herpes_LMP1	PF05297.6	83
MSTRG.98997.1	Herpes_LMP1	PF05297.6	176
MSTRG.17699.1	Herpes_UL3	PF03369.8	62
MSTRG.39862.1	Herpes_UL55	PF04537.7	35
MSTRG.50171.1	Hexapep_2	PF14602.1	20
MSTRG.131187.1	HpaB_N	PF11794.3	72
MSTRG.61646.1	HRM	PF02793.17	35
MSTRG.97791.1	HTH_AsnC-type	PF13404.1	29
MSTRG.125868.1	HTH_Mga	PF08280.6	41
MSTRG.49371.1	HTH_Tnp_IS1	PF12759.2	16
MSTRG.31825.1	HTH_Tnp_Tc3_2	PF01498.13	33
MSTRG.46827.1	Hyccin	PF09790.4	40
MSTRG.19462.1	IBB	PF01749.15	61
MSTRG.24718.1	IBV_3A	PF03617.8	16
MSTRG.40788.1	IBV_3A	PF03617.8	18
MSTRG.40788.5	IBV_3A	PF03617.8	18
MSTRG.58063.1	IBV_3A	PF03617.8	16
MSTRG.114970.1	ICAP-1_inte_bdg	PF10480.4	18
MSTRG.108923.1	ICMT	PF04140.9	30
MSTRG.58737.1	ICMT	PF04140.9	29
MSTRG.105443.1	Imm10	PF15562.1	15
MSTRG.3596.1	Intron_maturas2	PF01348.16	50
MSTRG.128194.1	INTS5_N	PF14837.1	35
MSTRG.28437.1	Ion_trans	PF00520.26	81
MSTRG.23963.1	Ion_trans_N	PF08412.5	23
MSTRG.38133.1	Ion_trans_N	PF08412.5	26
MSTRG.124016.1	IR1-M	PF12185.3	17
MSTRG.59092.2	Joubert	PF15392.1	222
MSTRG.59092.3	Joubert	PF15392.1	72
MSTRG.59094.2	Joubert	PF15392.1	222
MSTRG.59094.3	Joubert	PF15392.1	72
MSTRG.131743.1	KA1	PF02149.14	38
MSTRG.56853.1	K-box	PF01486.12	25
MSTRG.119324.1	Keratin_assoc	PF09775.4	67
MSTRG.87022.1	KLRAQ	PF10205.4	49
MSTRG.125923.1	KNOX2	PF03791.8	16
MSTRG.73381.1	L51_S25_CI-B8	PF05047.11	31
MSTRG.88222.2	Lactamase_B_2	PF12706.2	44
MSTRG.108699.1	LAT	PF15234.1	42
MSTRG.128953.1	LBP_BPI_CETP	PF01273.20	50
MSTRG.121422.1	Lectin_N	PF03954.9	32
MSTRG.21840.1	Lectin_N	PF03954.9	32
MSTRG.83842.1	Lectin_N	PF03954.9	42
MSTRG.37952.1	LETM1	PF07766.8	72
MSTRG.121770.1	Lip_A_acyltrans	PF03279.8	58
MSTRG.121300.1	Lipoprotein_10	PF03202.8	69
MSTRG.10034.1	Lipoprotein_11	PF03260.8	47
MSTRG.79743.1	Lipoprotein_3	PF00938.12	47
MSTRG.115034.1	LktC	PF06261.6	77
MSTRG.94931.1	LktC	PF06261.6	76
MSTRG.70696.1	LRR_3	PF07725.7	12
MSTRG.100291.1	LRR19-TM	PF15176.1	24
MSTRG.121077.1	LSM14	PF12701.2	34
MSTRG.126334.1	Luciferase_N	PF05295.6	41
MSTRG.102583.1	Luteo_Vpg	PF01659.11	40
MSTRG.126787.1	Luteo_Vpg	PF01659.11	41
MSTRG.78333.1	Lycopene_cycl	PF05834.7	64
MSTRG.54059.1	Lysis_S	PF04971.7	28
MSTRG.30392.1	MAD	PF05557.8	55
MSTRG.43756.1	MAGUK_N_PEST	PF10608.4	45
MSTRG.67799.1	MARVEL	PF01284.18	59
MSTRG.19848.1	MBOAT_2	PF13813.1	35
MSTRG.79335.1	Meiosis_expr	PF15163.1	56
MSTRG.87115.1	Meiosis_expr	PF15163.1	57
MSTRG.63380.4	Mem_trans	PF03547.13	67
MSTRG.18200.1	MepB	PF08877.5	48
MSTRG.82304.1	MerR_1	PF13411.1	20
MSTRG.127214.1	Methylase_S	PF01420.14	96
MSTRG.64826.1	Methyltransf_15	PF09445.5	45
MSTRG.64106.1	Methyltransf_25	PF13649.1	51
MSTRG.82857.1	M-inducer_phosp	PF06617.8	38
MSTRG.21306.1	Mitovir_RNA_pol	PF05919.6	26
MSTRG.129350.1	MnhB	PF04039.8	64
MSTRG.123154.1	MotB_plug	PF13677.1	21
MSTRG.93733.1	MRAP	PF15183.1	48
MSTRG.117733.1	MRP_L53	PF10780.4	24
MSTRG.118874.1	Mtc	PF03820.12	62
MSTRG.77433.1	Mucin	PF01456.12	18
MSTRG.121597.1	Myb_DNA-bind_4	PF13837.1	61
MSTRG.58386.1	Myb_DNA-bind_4	PF13837.1	72
MSTRG.124951.1	Myc_target_1	PF15179.1	59
MSTRG.121887.2	NADH_B2	PF14813.1	29
MSTRG.82247.1	NADH-G_4Fe-4S_3	PF10588.4	19
MSTRG.129359.1	NAM-associated	PF14303.1	102
MSTRG.22638.1	NAM-associated	PF14303.1	99
MSTRG.96409.5	NAM-associated	PF14303.1	131
MSTRG.64807.1	NARG2_C	PF10505.4	44
MSTRG.127326.1	Nbl1_Borealin_N	PF10444.4	19
MSTRG.121474.1	Ndc1_Nup	PF09531.5	113
MSTRG.57174.1	Ndc1_Nup	PF09531.5	80
MSTRG.19447.1	NdhL	PF10716.4	29
MSTRG.93505.1	Nepo_coat_N	PF03689.10	23
MSTRG.39178.1	NfeD	PF01957.13	59
MSTRG.74447.1	NfeD	PF01957.13	58
MSTRG.86630.1	NID	PF07292.8	36
MSTRG.119439.1	Ninjurin	PF04923.7	57
MSTRG.79290.3	NPBW	PF15180.1	32
MSTRG.119211.1	NSP2_assoc	PF14758.1	41
MSTRG.120665.1	NTPase_1	PF03266.10	34
MSTRG.68103.1	Nuc_H_symport	PF03825.11	79
MSTRG.124037.1	Nuc_recep-AF1	PF11825.3	23
MSTRG.124040.1	Nucleo_LEF-12	PF06256.6	33
MSTRG.113343.1	Nudix_N_2	PF14803.1	13
MSTRG.91155.1	NUMOD3	PF07460.6	15
MSTRG.95394.1	Nup35_RRM	PF05172.8	38
MSTRG.129588.1	NusB	PF01029.13	22
MSTRG.99742.1	ODV-E18	PF10717.4	24
MSTRG.13890.1	Ofd1_CTDD	PF10637.4	78
MSTRG.59822.2	Omega-toxin	PF06357.6	13
MSTRG.82850.1	OMP_b-brl_2	PF13568.1	59
MSTRG.76227.1	Orbi_NS3	PF01616.11	50
MSTRG.65460.1	Orbi_VP1	PF05788.7	56
MSTRG.34347.1	Oxidored_q1_C	PF01010.14	88
MSTRG.128645.1	PACT_coil_coil	PF10495.4	23
MSTRG.128436.1	Paf67	PF10255.4	44
MSTRG.88336.1	PAM2	PF07145.10	8
MSTRG.93673.1	PAN_3	PF08277.7	29
MSTRG.71080.1	PAN_4	PF14295.1	25
MSTRG.118479.2	PAPS_reduct	PF01507.14	79
MSTRG.36326.1	Pardaxin	PF07425.6	19
MSTRG.31955.1	PBCV_basic_adap	PF08789.5	22
MSTRG.51637.1	PBP1_TM	PF14812.1	60
MSTRG.46743.1	PD40	PF07676.7	19
MSTRG.108565.1	PDE8	PF08629.5	39
MSTRG.115855.1	PDE8	PF08629.5	24
MSTRG.70314.1	PDR_CDR	PF06422.7	29
MSTRG.9953.1	Peptidase_C27	PF05407.7	73
MSTRG.111035.1	Peptidase_C48	PF02902.14	210
MSTRG.32977.2	Peptidase_C48	PF02902.14	174
MSTRG.33004.4	Peptidase_C48	PF02902.14	174
MSTRG.61727.1	Peptidase_C9	PF01707.11	64
MSTRG.33500.1	Peptidase_M50B	PF13398.1	47
MSTRG.122001.1	Peptidase_S32	PF05579.8	60
MSTRG.120593.1	Peptidase_S46	PF10459.4	45
MSTRG.64569.2	Peptidase_S49_N	PF08496.5	79
MSTRG.7928.1	Peptidase_S49_N	PF08496.5	78
MSTRG.97645.1	Peptidase_S49_N	PF08496.5	91
MSTRG.62799.1	Periviscerokin	PF08259.6	4
MSTRG.25740.1	Peroxin-13_N	PF04088.8	52
MSTRG.93676.1	PetN	PF03742.9	12
MSTRG.88227.1	Pex14_N	PF04695.8	63
MSTRG.92968.1	Pex16	PF08610.5	39
MSTRG.17669.1	Pex24p	PF06398.6	43
MSTRG.51785.1	Pex26	PF07163.7	28
MSTRG.99852.1	PgaD	PF13994.1	38
MSTRG.58506.1	PGC7_Stella	PF15549.1	57
MSTRG.107825.1	PH_5	PF15405.1	72
MSTRG.101018.1	Phage_int_SAM_2	PF12834.2	39
MSTRG.118942.1	Phage_int_SAM_4	PF13495.1	33
MSTRG.17609.1	Phage-tail_2	PF09096.5	38
MSTRG.102033.1	Phospholamban	PF04272.9	31
MSTRG.102033.2	Phospholamban	PF04272.9	31
MSTRG.56123.1	Phospholamban	PF04272.9	31
MSTRG.19845.1	PI3K_1B_p101	PF10486.4	36
MSTRG.120727.1	PIF1	PF05970.9	106
MSTRG.122391.1	PIG-F	PF06699.6	64
MSTRG.85892.1	PIG-H	PF10181.4	24
MSTRG.126635.3	PilO	PF04350.8	65
MSTRG.124526.1	PIN_3	PF13470.1	49
MSTRG.79224.1	PIP5K	PF01504.13	54
MSTRG.24963.1	Pkinase	PF00069.20	39
MSTRG.103015.1	Plant_tran	PF04827.9	71
MSTRG.110448.1	Plant_tran	PF04827.9	203
MSTRG.123645.1	Plant_tran	PF04827.9	203
MSTRG.127444.1	Plant_tran	PF04827.9	203
MSTRG.30740.1	Plant_tran	PF04827.9	182
MSTRG.38715.1	Plant_tran	PF04827.9	203
MSTRG.61050.1	Plant_tran	PF04827.9	194
MSTRG.64036.1	Plant_tran	PF04827.9	202
MSTRG.71359.1	Plant_tran	PF04827.9	130
MSTRG.74960.1	Plant_tran	PF04827.9	129
MSTRG.79054.1	Plant_tran	PF04827.9	203
MSTRG.41160.1	Plexin_cytopl	PF08337.7	59
MSTRG.124453.1	PMD	PF10536.4	112
MSTRG.124035.1	Pneumovirus_M2	PF06436.6	46
MSTRG.38443.1	PolyA_pol_arg_C	PF12626.2	33
MSTRG.129944.1	PolyA_pol_RNAbd	PF12627.2	36
MSTRG.9307.2	Pox_A12	PF04651.8	89
MSTRG.81450.1	Pox_D5	PF03288.11	51
MSTRG.8111.2	Pox_I5	PF04713.7	51
MSTRG.125397.1	Pox_RNA_Pol_22	PF05273.8	50
MSTRG.126475.1	PP1	PF07430.6	39
MSTRG.80173.1	PPR_1	PF12854.2	16
MSTRG.80888.1	PPV_E2_N	PF00508.12	44
MSTRG.24975.1	PQ-loop	PF04193.9	29
MSTRG.58567.1	PRD_Mga	PF08270.6	47
MSTRG.7690.1	PRD_Mga	PF08270.6	57
MSTRG.30692.1	Pro-rich	PF15240.1	101
MSTRG.98207.1	ProRS-C_1	PF09180.6	28
MSTRG.21556.1	Prp19_bind	PF06991.6	36
MSTRG.52345.1	Prp19_bind	PF06991.6	36
MSTRG.68725.1	PsbL	PF02419.12	21
MSTRG.121675.1	PV_NSP1	PF12433.3	32
MSTRG.86463.1	PV_NSP1	PF12433.3	27
MSTRG.80472.2	PV-1	PF06637.6	36
MSTRG.37246.1	PWWP	PF00855.12	37
MSTRG.31024.1	QueF_N	PF14819.1	70
MSTRG.5997.1	QueF_N	PF14819.1	42
MSTRG.105263.2	RabGGT_insert	PF07711.6	67
MSTRG.19950.1	Rac1	PF09632.5	49
MSTRG.79597.1	Rad60-SLD_2	PF13881.1	38
MSTRG.86388.1	RAI16-like	PF10257.4	46
MSTRG.115807.1	Rax2	PF12768.2	117
MSTRG.31474.1	Rax2	PF12768.2	117
MSTRG.71728.1	Rax2	PF12768.2	27
MSTRG.51137.4	RbcS	PF12338.3	18
MSTRG.92325.1	Rep_4	PF05797.6	47
MSTRG.121046.3	Rep_fac-A_C	PF08646.5	75
MSTRG.28858.1	RepB	PF07506.6	54
MSTRG.129795.1	Retrotrans_gag	PF03732.12	94
MSTRG.60098.1	Retrotrans_gag	PF03732.12	85
MSTRG.74448.1	RHIM	PF12721.2	34
MSTRG.121022.1	RhoGAP	PF00620.22	129
MSTRG.100095.1	RHS_repeat	PF05593.9	23
MSTRG.90556.1	Ribosomal_L6e	PF01159.14	60
MSTRG.131663.8	Ribosomal_S15	PF00312.17	42
MSTRG.42967.1	Ribosomal_S19	PF00203.16	26
MSTRG.91178.1	Ribosomal_S9	PF00380.14	96
MSTRG.22496.1	Ring_hydroxyl_A	PF00848.14	67
MSTRG.26566.1	RNA_bind	PF08675.6	37
MSTRG.104592.1	RNA_pol_3_Rpc31	PF11705.3	110
MSTRG.57241.1	RNA_pol_I_A49	PF06870.7	48
MSTRG.117967.1	RNase_H	PF00075.19	125
MSTRG.123704.1	RNase_H	PF00075.19	102
MSTRG.47131.1	RNase_H	PF00075.19	125
MSTRG.80345.1	RNase_H	PF00075.19	123
MSTRG.95402.1	RNase_H	PF00075.19	107
MSTRG.54833.1	Rod_C	PF10493.4	42
MSTRG.61196.1	RolB_RolC	PF02027.12	43
MSTRG.111931.1	Rop	PF01815.11	25
MSTRG.82704.1	RPM2	PF08579.6	85
MSTRG.131437.1	RRM_6	PF14259.1	51
MSTRG.121968.1	Rsm1	PF08600.5	19
MSTRG.122694.1	rve	PF00665.21	71
MSTRG.82778.3	rve	PF00665.21	34
MSTRG.85203.1	rve	PF00665.21	102
MSTRG.90886.1	rve	PF00665.21	64
MSTRG.3382.1	rve_3	PF13683.1	29
MSTRG.104121.1	RVP_2	PF08284.6	96
MSTRG.109005.1	RVP_2	PF08284.6	111
MSTRG.120439.1	RVP_2	PF08284.6	112
MSTRG.78204.1	RVP_2	PF08284.6	111
MSTRG.90097.1	RVP_2	PF08284.6	112
MSTRG.110397.1	RVT_1	PF00078.22	72
MSTRG.59040.1	RVT_1	PF00078.22	210
MSTRG.59783.1	RVT_1	PF00078.22	213
MSTRG.70069.1	RVT_1	PF00078.22	194
MSTRG.70609.1	RVT_1	PF00078.22	187
MSTRG.89059.1	RVT_1	PF00078.22	214
MSTRG.100441.1	RVT_2	PF07727.9	158
MSTRG.103076.1	RVT_2	PF07727.9	38
MSTRG.110926.1	RVT_2	PF07727.9	245
MSTRG.113989.1	RVT_2	PF07727.9	214
MSTRG.123733.1	RVT_2	PF07727.9	90
MSTRG.4162.1	RVT_2	PF07727.9	162
MSTRG.58481.1	RVT_2	PF07727.9	37
MSTRG.58691.1	RVT_2	PF07727.9	135
MSTRG.90049.1	RVT_2	PF07727.9	231
MSTRG.90299.1	RVT_2	PF07727.9	238
MSTRG.91078.1	RVT_2	PF07727.9	40
MSTRG.11624.1	RVT_3	PF13456.1	71
MSTRG.23892.1	RVT_3	PF13456.1	84
MSTRG.27875.1	RVT_3	PF13456.1	37
MSTRG.32736.1	RVT_3	PF13456.1	82
MSTRG.40120.1	RVT_3	PF13456.1	85
MSTRG.47.1	RVT_3	PF13456.1	53
MSTRG.70567.1	RVT_3	PF13456.1	81
MSTRG.75865.1	RVT_3	PF13456.1	39
MSTRG.95037.1	RVT_3	PF13456.1	36
MSTRG.56027.1	S1FA	PF04689.8	28
MSTRG.71252.1	S6PP	PF05116.8	55
MSTRG.115424.1	Sarcoglycan_2	PF05510.8	38
MSTRG.33907.1	Sarcolipin	PF05366.6	21
MSTRG.46885.1	Sas10_Utp3	PF04000.10	58
MSTRG.128264.1	SbcD_C	PF12320.3	46
MSTRG.97471.2	SBDS_C	PF09377.5	43
MSTRG.78973.1	SCAMP	PF04144.8	27
MSTRG.68441.2	SCP1201-deam	PF14428.1	84
MSTRG.83870.1	SCP2_2	PF13530.1	53
MSTRG.84253.1	Sec1	PF00995.18	53
MSTRG.90884.1	Sec1	PF00995.18	51
MSTRG.101324.1	Selenoprotein_S	PF06936.6	105
MSTRG.103741.1	Sensor_TM1	PF13755.1	22
MSTRG.27354.1	SgrR_N	PF12793.2	67
MSTRG.129749.1	She2p	PF11435.3	40
MSTRG.46890.1	Sigma_reg_N	PF13800.1	32
MSTRG.96624.1	Sigma_reg_N	PF13800.1	32
MSTRG.11808.1	Sigma54_AID	PF00309.15	23
MSTRG.22293.1	Sigma70_r2	PF04542.9	24
MSTRG.60730.1	SKI	PF01202.17	45
MSTRG.113292.1	SLBP_RNA_bind	PF15247.1	38
MSTRG.119322.1	Spore_permease	PF03845.8	37
MSTRG.90684.1	SPX	PF03105.14	55
MSTRG.101874.1	SR-25	PF10500.4	43
MSTRG.8676.1	SRC-1	PF08832.5	33
MSTRG.9836.1	Sre	PF03125.13	73
MSTRG.124582.1	SRP9-21	PF05486.7	44
MSTRG.59114.1	SRP-alpha_N	PF04086.8	116
MSTRG.125855.1	SspN	PF08177.6	31
MSTRG.104036.1	STE3	PF02076.10	23
MSTRG.11617.1	SUD-M	PF11633.3	72
MSTRG.117958.1	SUR7	PF06687.7	60
MSTRG.98974.1	SUR7	PF06687.7	61
MSTRG.103113.1	Sushi_2	PF09014.5	28
MSTRG.109790.1	SWIB	PF02201.13	29
MSTRG.122009.1	SYS1	PF09801.4	47
MSTRG.115339.2	T_Ag_DNA_bind	PF02217.11	69
MSTRG.116524.1	T_Ag_DNA_bind	PF02217.11	71
MSTRG.84315.1	T_Ag_DNA_bind	PF02217.11	70
MSTRG.68524.1	TAF4	PF05236.9	82
MSTRG.95430.1	TAP35_44	PF07265.6	71
MSTRG.23783.1	TBCC	PF07986.7	51
MSTRG.122728.1	Tcp10_C	PF07202.8	83
MSTRG.92272.1	Tcp10_C	PF07202.8	55
MSTRG.44044.1	TctA	PF01970.11	80
MSTRG.122995.1	TEP1_N	PF05386.6	18
MSTRG.60365.1	Terminase_5	PF06056.7	24
MSTRG.107253.1	TFIIS_C	PF01096.13	15
MSTRG.97052.1	Thyroglobulin_1	PF00086.13	30
MSTRG.65407.1	tify	PF06200.9	8
MSTRG.100911.1	TM2	PF05154.11	27
MSTRG.56888.1	TM2	PF05154.11	20
MSTRG.112181.1	TMEM51	PF15345.1	131
MSTRG.61186.1	Tna_leader	PF08053.6	15
MSTRG.116796.2	Tnp_zf-ribbon_2	PF13842.1	24
MSTRG.119236.1	Toxin_1	PF00087.16	41
MSTRG.40392.1	Toxin_10	PF05431.6	42
MSTRG.47290.1	Toxin_10	PF05431.6	67
MSTRG.123421.1	Toxin_11	PF07473.6	12
MSTRG.120321.1	Toxin_15	PF07906.8	22
MSTRG.30231.1	Toxin_30	PF08117.6	13
MSTRG.86679.1	Toxin_64	PF15542.1	88
MSTRG.117873.2	Toxin_8	PF07365.7	24
MSTRG.45676.3	Toxin_8	PF07365.7	18
MSTRG.84558.1	TPP_enzyme_N	PF02776.13	59
MSTRG.77371.1	TRADD_N	PF09034.5	38
MSTRG.35758.1	Transglut_core2	PF13369.1	31
MSTRG.4862.1	Transpos_assoc	PF13963.1	17
MSTRG.67828.1	Transpos_assoc	PF13963.1	70
MSTRG.77260.1	Transpos_assoc	PF13963.1	73
MSTRG.124892.1	Transposase_21	PF02992.9	223
MSTRG.125399.1	Transposase_21	PF02992.9	216
MSTRG.126617.1	Transposase_21	PF02992.9	108
MSTRG.129103.1	Transposase_21	PF02992.9	78
MSTRG.45875.1	Transposase_21	PF02992.9	224
MSTRG.57406.1	Transposase_21	PF02992.9	123
MSTRG.60243.1	Transposase_21	PF02992.9	121
MSTRG.68411.1	Transposase_21	PF02992.9	221
MSTRG.75948.1	Transposase_21	PF02992.9	151
MSTRG.83062.1	Transposase_21	PF02992.9	156
MSTRG.38170.1	Transposase_23	PF03017.9	72
MSTRG.62204.1	Transposase_23	PF03017.9	30
MSTRG.107346.1	Transposase_24	PF03004.9	72
MSTRG.107346.2	Transposase_24	PF03004.9	72
MSTRG.114054.1	Transposase_24	PF03004.9	72
MSTRG.115654.3	Transposase_24	PF03004.9	79
MSTRG.118640.1	Transposase_24	PF03004.9	49
MSTRG.121550.1	Transposase_24	PF03004.9	45
MSTRG.121692.1	Transposase_24	PF03004.9	45
MSTRG.41319.1	Transposase_24	PF03004.9	86
MSTRG.44246.1	Transposase_24	PF03004.9	56
MSTRG.53621.1	Transposase_24	PF03004.9	72
MSTRG.62458.3	Transposase_24	PF03004.9	52
MSTRG.62692.1	Transposase_24	PF03004.9	48
MSTRG.62692.2	Transposase_24	PF03004.9	52
MSTRG.66869.1	Transposase_24	PF03004.9	50
MSTRG.80472.1	Transposase_24	PF03004.9	48
MSTRG.95134.1	Transposase_24	PF03004.9	52
MSTRG.55712.1	Transposase_mut	PF00872.13	116
MSTRG.17175.1	TRAP-gamma	PF07074.7	57
MSTRG.113927.1	TRAPPC-Trs85	PF12739.2	37
MSTRG.116861.1	TrbC_Ftype	PF09673.5	23
MSTRG.41544.1	tRNA_deacylase	PF04414.7	49
MSTRG.83112.1	tRNA_int_endo_N	PF02778.9	35
MSTRG.95224.1	tRNA-synt_1_2	PF13603.1	25
MSTRG.10280.1	TSGP1	PF07771.6	28
MSTRG.58352.1	TSGP1	PF07771.6	49
MSTRG.34144.1	U79_P34	PF03064.11	24
MSTRG.21607.1	UBA_4	PF14555.1	16
MSTRG.84793.1	Ubiquitin_3	PF14836.1	50
MSTRG.44026.1	UBN2	PF14223.1	106
MSTRG.65028.1	UBN2	PF14223.1	70
MSTRG.85760.1	UBN2	PF14223.1	105
MSTRG.108659.1	UBN2_3	PF14244.1	39
MSTRG.115693.4	UBN2_3	PF14244.1	150
MSTRG.32767.1	UBN2_3	PF14244.1	123
MSTRG.4241.1	UBN2_3	PF14244.1	131
MSTRG.4241.2	UBN2_3	PF14244.1	131
MSTRG.60016.1	UBN2_3	PF14244.1	120
MSTRG.81468.1	UBN2_3	PF14244.1	116
MSTRG.88992.1	UBN2_3	PF14244.1	90
MSTRG.41911.1	UCR_14kD	PF02271.11	43
MSTRG.127921.1	UCR_UQCRX_QCR9	PF05365.7	17
MSTRG.96693.1	Unstab_antitox	PF09720.5	27
MSTRG.122698.1	UPF0542	PF15086.1	40
MSTRG.3410.1	UvrD_C_2	PF13538.1	22
MSTRG.41109.1	Vac7	PF12751.2	37
MSTRG.28965.1	Viral_Beta_CD	PF04530.7	50
MSTRG.54580.1	VIT1	PF01988.14	101
MSTRG.90417.1	Vma12	PF11712.3	64
MSTRG.115782.1	Vps39_2	PF10367.4	39
MSTRG.84312.1	WAK	PF08488.6	58
MSTRG.64526.2	WAPL	PF07814.8	71
MSTRG.119132.1	Wzz	PF02706.10	52
MSTRG.71156.1	XRN_N	PF03159.13	36
MSTRG.26771.1	Ycf66_N	PF07444.6	43
MSTRG.120332.1	Yos1	PF08571.5	33
MSTRG.29782.1	YusW	PF14039.1	60
MSTRG.18527.1	YvbH_ext	PF11724.3	35
MSTRG.130191.1	YxiJ	PF14176.1	69
MSTRG.122895.1	Zein-binding	PF04576.10	36
MSTRG.81206.1	zf-AD	PF07776.10	54
MSTRG.121720.1	zf-B_box	PF00643.19	19
MSTRG.38029.1	zf-BED	PF02892.10	44
MSTRG.115070.1	zf-C2H2	PF00096.21	19
MSTRG.12761.1	zf-C2H2_7	PF15269.1	29
MSTRG.35207.1	zf-C2H2_7	PF15269.1	37
MSTRG.58978.2	zf-C3Hc3H	PF13891.1	48
MSTRG.9047.1	zf-C3HC4_2	PF13923.1	24
MSTRG.37754.2	zf-CHCC	PF10276.4	9
MSTRG.115048.1	zf-DHHC	PF01529.15	57
MSTRG.120070.1	zf-DHHC	PF01529.15	65
MSTRG.61306.1	zf-DHHC	PF01529.15	53
MSTRG.122506.1	zf-DNL	PF05180.7	48
MSTRG.75054.1	zf-LITAF-like	PF10601.4	35
MSTRG.14871.1	zf-met	PF12874.2	12
MSTRG.118414.1	zf-Nse	PF11789.3	20
MSTRG.38079.1	zf-RING-like	PF08746.6	23
MSTRG.101402.1	zf-RVT	PF13966.1	50
MSTRG.129023.1	zf-RVT	PF13966.1	85
MSTRG.24738.1	zf-RVT	PF13966.1	85
MSTRG.70610.1	zf-RVT	PF13966.1	85
MSTRG.82693.1	zf-RVT	PF13966.1	85
MSTRG.100011.1	Unknown
MSTRG.100012.1	Unknown
MSTRG.100076.1	Unknown
MSTRG.10014.1	Unknown
MSTRG.100212.1	Unknown
MSTRG.100226.1	Unknown
MSTRG.100228.1	Unknown
MSTRG.100229.1	Unknown
MSTRG.100233.1	Unknown
MSTRG.100313.1	Unknown
MSTRG.100317.1	Unknown
MSTRG.100331.1	Unknown
MSTRG.10037.1	Unknown
MSTRG.100424.2	Unknown
MSTRG.100471.1	Unknown
MSTRG.100484.1	Unknown
MSTRG.100496.1	Unknown
MSTRG.100497.1	Unknown
MSTRG.10050.1	Unknown
MSTRG.100505.2	Unknown
MSTRG.100527.1	Unknown
MSTRG.100529.1	Unknown
MSTRG.100537.1	Unknown
MSTRG.100567.1	Unknown
MSTRG.100585.1	Unknown
MSTRG.100625.1	Unknown
MSTRG.100713.1	Unknown
MSTRG.100803.1	Unknown
MSTRG.100806.1	Unknown
MSTRG.100827.1	Unknown
MSTRG.100848.1	Unknown
MSTRG.100968.1	Unknown
MSTRG.10097.1	Unknown
MSTRG.101026.1	Unknown
MSTRG.101038.1	Unknown
MSTRG.101052.1	Unknown
MSTRG.101086.1	Unknown
MSTRG.101130.1	Unknown
MSTRG.101137.1	Unknown
MSTRG.101148.1	Unknown
MSTRG.101157.1	Unknown
MSTRG.101163.1	Unknown
MSTRG.101177.1	Unknown
MSTRG.101178.1	Unknown
MSTRG.101184.1	Unknown
MSTRG.101223.2	Unknown
MSTRG.101251.1	Unknown
MSTRG.101327.1	Unknown
MSTRG.101339.1	Unknown
MSTRG.101409.1	Unknown
MSTRG.101444.1	Unknown
MSTRG.10148.1	Unknown
MSTRG.101503.1	Unknown
MSTRG.101541.1	Unknown
MSTRG.101556.1	Unknown
MSTRG.101572.1	Unknown
MSTRG.101620.1	Unknown
MSTRG.101687.1	Unknown
MSTRG.101712.1	Unknown
MSTRG.101733.1	Unknown
MSTRG.101736.1	Unknown
MSTRG.101746.1	Unknown
MSTRG.101751.1	Unknown
MSTRG.101758.1	Unknown
MSTRG.101761.1	Unknown
MSTRG.101797.1	Unknown
MSTRG.10180.1	Unknown
MSTRG.101810.1	Unknown
MSTRG.101836.1	Unknown
MSTRG.101838.1	Unknown
MSTRG.101839.1	Unknown
MSTRG.101840.1	Unknown
MSTRG.101842.1	Unknown
MSTRG.101873.1	Unknown
MSTRG.101922.1	Unknown
MSTRG.101938.1	Unknown
MSTRG.101943.1	Unknown
MSTRG.101951.1	Unknown
MSTRG.101959.1	Unknown
MSTRG.102034.1	Unknown
MSTRG.102070.1	Unknown
MSTRG.102107.1	Unknown
MSTRG.102129.1	Unknown
MSTRG.102148.1	Unknown
MSTRG.102164.1	Unknown
MSTRG.102183.1	Unknown
MSTRG.102186.1	Unknown
MSTRG.102188.1	Unknown
MSTRG.102212.1	Unknown
MSTRG.102235.1	Unknown
MSTRG.102247.1	Unknown
MSTRG.102359.1	Unknown
MSTRG.102397.1	Unknown
MSTRG.10240.1	Unknown
MSTRG.102480.1	Unknown
MSTRG.102493.1	Unknown
MSTRG.102502.1	Unknown
MSTRG.102512.1	Unknown
MSTRG.102567.1	Unknown
MSTRG.102576.1	Unknown
MSTRG.102579.1	Unknown
MSTRG.102595.1	Unknown
MSTRG.102663.1	Unknown
MSTRG.102701.1	Unknown
MSTRG.102715.1	Unknown
MSTRG.102719.1	Unknown
MSTRG.102726.1	Unknown
MSTRG.102729.1	Unknown
MSTRG.102882.1	Unknown
MSTRG.102886.1	Unknown
MSTRG.102962.1	Unknown
MSTRG.102978.1	Unknown
MSTRG.103014.1	Unknown
MSTRG.103072.1	Unknown
MSTRG.103074.1	Unknown
MSTRG.103127.1	Unknown
MSTRG.103154.1	Unknown
MSTRG.103293.1	Unknown
MSTRG.103328.1	Unknown
MSTRG.103472.1	Unknown
MSTRG.103478.2	Unknown
MSTRG.103521.1	Unknown
MSTRG.103551.1	Unknown
MSTRG.103553.1	Unknown
MSTRG.103648.1	Unknown
MSTRG.103652.1	Unknown
MSTRG.103703.1	Unknown
MSTRG.103727.1	Unknown
MSTRG.103731.1	Unknown
MSTRG.103744.1	Unknown
MSTRG.103749.1	Unknown
MSTRG.103758.1	Unknown
MSTRG.103792.1	Unknown
MSTRG.103798.1	Unknown
MSTRG.103806.1	Unknown
MSTRG.103825.1	Unknown
MSTRG.103841.1	Unknown
MSTRG.103905.1	Unknown
MSTRG.103930.1	Unknown
MSTRG.103937.1	Unknown
MSTRG.104088.1	Unknown
MSTRG.104132.1	Unknown
MSTRG.104272.1	Unknown
MSTRG.104298.1	Unknown
MSTRG.104331.1	Unknown
MSTRG.10435.1	Unknown
MSTRG.104395.1	Unknown
MSTRG.104478.1	Unknown
MSTRG.104482.1	Unknown
MSTRG.104537.1	Unknown
MSTRG.104557.1	Unknown
MSTRG.104625.1	Unknown
MSTRG.104676.1	Unknown
MSTRG.104750.1	Unknown
MSTRG.104752.1	Unknown
MSTRG.104760.1	Unknown
MSTRG.104802.1	Unknown
MSTRG.10482.1	Unknown
MSTRG.10485.1	Unknown
MSTRG.104852.1	Unknown
MSTRG.104857.1	Unknown
MSTRG.104914.1	Unknown
MSTRG.104915.1	Unknown
MSTRG.105048.1	Unknown
MSTRG.105048.2	Unknown
MSTRG.105060.1	Unknown
MSTRG.105138.1	Unknown
MSTRG.105210.1	Unknown
MSTRG.105211.1	Unknown
MSTRG.105247.1	Unknown
MSTRG.105264.1	Unknown
MSTRG.105309.1	Unknown
MSTRG.105318.1	Unknown
MSTRG.105320.1	Unknown
MSTRG.105322.1	Unknown
MSTRG.105346.1	Unknown
MSTRG.105399.1	Unknown
MSTRG.105446.1	Unknown
MSTRG.10551.1	Unknown
MSTRG.105513.1	Unknown
MSTRG.105598.1	Unknown
MSTRG.105630.1	Unknown
MSTRG.105632.1	Unknown
MSTRG.105640.1	Unknown
MSTRG.105658.1	Unknown
MSTRG.105688.1	Unknown
MSTRG.10569.1	Unknown
MSTRG.105697.1	Unknown
MSTRG.105744.1	Unknown
MSTRG.105846.1	Unknown
MSTRG.105891.1	Unknown
MSTRG.106003.1	Unknown
MSTRG.106011.1	Unknown
MSTRG.106162.1	Unknown
MSTRG.106205.1	Unknown
MSTRG.106211.1	Unknown
MSTRG.106215.1	Unknown
MSTRG.106216.1	Unknown
MSTRG.106233.1	Unknown
MSTRG.106250.1	Unknown
MSTRG.106263.1	Unknown
MSTRG.106266.1	Unknown
MSTRG.106269.1	Unknown
MSTRG.106285.1	Unknown
MSTRG.106297.1	Unknown
MSTRG.106299.1	Unknown
MSTRG.106301.1	Unknown
MSTRG.106310.1	Unknown
MSTRG.106317.1	Unknown
MSTRG.106409.1	Unknown
MSTRG.106473.1	Unknown
MSTRG.106485.1	Unknown
MSTRG.106501.1	Unknown
MSTRG.106503.1	Unknown
MSTRG.106536.1	Unknown
MSTRG.106546.1	Unknown
MSTRG.106564.1	Unknown
MSTRG.106567.1	Unknown
MSTRG.106589.1	Unknown
MSTRG.10660.1	Unknown
MSTRG.106616.1	Unknown
MSTRG.106616.2	Unknown
MSTRG.106619.1	Unknown
MSTRG.106624.1	Unknown
MSTRG.106640.1	Unknown
MSTRG.106643.1	Unknown
MSTRG.106660.1	Unknown
MSTRG.106715.1	Unknown
MSTRG.106730.1	Unknown
MSTRG.106734.1	Unknown
MSTRG.106753.1	Unknown
MSTRG.106772.1	Unknown
MSTRG.106777.1	Unknown
MSTRG.106781.1	Unknown
MSTRG.106797.1	Unknown
MSTRG.106821.1	Unknown
MSTRG.106823.1	Unknown
MSTRG.106837.1	Unknown
MSTRG.106850.1	Unknown
MSTRG.106922.1	Unknown
MSTRG.106927.1	Unknown
MSTRG.106939.1	Unknown
MSTRG.106939.2	Unknown
MSTRG.106947.1	Unknown
MSTRG.106971.1	Unknown
MSTRG.107008.12	Unknown
MSTRG.107009.1	Unknown
MSTRG.107010.1	Unknown
MSTRG.107036.1	Unknown
MSTRG.107044.1	Unknown
MSTRG.107046.1	Unknown
MSTRG.107120.1	Unknown
MSTRG.10714.1	Unknown
MSTRG.107143.1	Unknown
MSTRG.107146.1	Unknown
MSTRG.107168.1	Unknown
MSTRG.107169.1	Unknown
MSTRG.107171.1	Unknown
MSTRG.107178.1	Unknown
MSTRG.107181.1	Unknown
MSTRG.107182.1	Unknown
MSTRG.107187.1	Unknown
MSTRG.107231.1	Unknown
MSTRG.107256.1	Unknown
MSTRG.107279.1	Unknown
MSTRG.10728.1	Unknown
MSTRG.107305.1	Unknown
MSTRG.107306.1	Unknown
MSTRG.107336.1	Unknown
MSTRG.107341.1	Unknown
MSTRG.107365.1	Unknown
MSTRG.107366.1	Unknown
MSTRG.107397.1	Unknown
MSTRG.107402.1	Unknown
MSTRG.107403.1	Unknown
MSTRG.107414.1	Unknown
MSTRG.107424.1	Unknown
MSTRG.107431.1	Unknown
MSTRG.107446.3	Unknown
MSTRG.107451.1	Unknown
MSTRG.107573.1	Unknown
MSTRG.107584.1	Unknown
MSTRG.107585.1	Unknown
MSTRG.107598.1	Unknown
MSTRG.107603.1	Unknown
MSTRG.107615.1	Unknown
MSTRG.107632.1	Unknown
MSTRG.107743.1	Unknown
MSTRG.107744.1	Unknown
MSTRG.107746.1	Unknown
MSTRG.107769.1	Unknown
MSTRG.107809.1	Unknown
MSTRG.107829.1	Unknown
MSTRG.107990.1	Unknown
MSTRG.108051.1	Unknown
MSTRG.108052.1	Unknown
MSTRG.1081.1	Unknown
MSTRG.108252.1	Unknown
MSTRG.108345.1	Unknown
MSTRG.108409.1	Unknown
MSTRG.108417.1	Unknown
MSTRG.108465.1	Unknown
MSTRG.10847.1	Unknown
MSTRG.108491.1	Unknown
MSTRG.108520.1	Unknown
MSTRG.108534.1	Unknown
MSTRG.108545.1	Unknown
MSTRG.108547.1	Unknown
MSTRG.108614.1	Unknown
MSTRG.108661.1	Unknown
MSTRG.108676.1	Unknown
MSTRG.108697.1	Unknown
MSTRG.10870.1	Unknown
MSTRG.108702.1	Unknown
MSTRG.108718.1	Unknown
MSTRG.108731.1	Unknown
MSTRG.108750.1	Unknown
MSTRG.108911.1	Unknown
MSTRG.108937.1	Unknown
MSTRG.108960.1	Unknown
MSTRG.108963.1	Unknown
MSTRG.108969.1	Unknown
MSTRG.108972.1	Unknown
MSTRG.108974.1	Unknown
MSTRG.108982.1	Unknown
MSTRG.109025.1	Unknown
MSTRG.109105.1	Unknown
MSTRG.109214.1	Unknown
MSTRG.109228.1	Unknown
MSTRG.109278.1	Unknown
MSTRG.109292.1	Unknown
MSTRG.109292.2	Unknown
MSTRG.109310.1	Unknown
MSTRG.109388.1	Unknown
MSTRG.109389.1	Unknown
MSTRG.109465.11	Unknown
MSTRG.109549.2	Unknown
MSTRG.109568.1	Unknown
MSTRG.109571.1	Unknown
MSTRG.109589.1	Unknown
MSTRG.109615.1	Unknown
MSTRG.109656.1	Unknown
MSTRG.109872.1	Unknown
MSTRG.109890.1	Unknown
MSTRG.109898.1	Unknown
MSTRG.109902.1	Unknown
MSTRG.10992.1	Unknown
MSTRG.109969.1	Unknown
MSTRG.11004.1	Unknown
MSTRG.110067.1	Unknown
MSTRG.11007.1	Unknown
MSTRG.110095.1	Unknown
MSTRG.110105.1	Unknown
MSTRG.110164.1	Unknown
MSTRG.110180.1	Unknown
MSTRG.110180.2	Unknown
MSTRG.110180.3	Unknown
MSTRG.110187.1	Unknown
MSTRG.110268.1	Unknown
MSTRG.110287.1	Unknown
MSTRG.110375.1	Unknown
MSTRG.110424.1	Unknown
MSTRG.110448.2	Unknown
MSTRG.110542.1	Unknown
MSTRG.110566.1	Unknown
MSTRG.110591.1	Unknown
MSTRG.110592.1	Unknown
MSTRG.110593.1	Unknown
MSTRG.110616.1	Unknown
MSTRG.110617.1	Unknown
MSTRG.110640.1	Unknown
MSTRG.110658.1	Unknown
MSTRG.110690.1	Unknown
MSTRG.110796.1	Unknown
MSTRG.110855.1	Unknown
MSTRG.110867.1	Unknown
MSTRG.11087.1	Unknown
MSTRG.110918.1	Unknown
MSTRG.111005.1	Unknown
MSTRG.111037.1	Unknown
MSTRG.111096.1	Unknown
MSTRG.11118.1	Unknown
MSTRG.111197.1	Unknown
MSTRG.111206.1	Unknown
MSTRG.111208.1	Unknown
MSTRG.111234.1	Unknown
MSTRG.111245.1	Unknown
MSTRG.111251.1	Unknown
MSTRG.111267.1	Unknown
MSTRG.111291.1	Unknown
MSTRG.111295.1	Unknown
MSTRG.111444.1	Unknown
MSTRG.111451.1	Unknown
MSTRG.111474.1	Unknown
MSTRG.111518.1	Unknown
MSTRG.111518.2	Unknown
MSTRG.111523.1	Unknown
MSTRG.111542.1	Unknown
MSTRG.111634.1	Unknown
MSTRG.111636.1	Unknown
MSTRG.111660.1	Unknown
MSTRG.111779.1	Unknown
MSTRG.111862.1	Unknown
MSTRG.111871.1	Unknown
MSTRG.111874.1	Unknown
MSTRG.111977.1	Unknown
MSTRG.111987.1	Unknown
MSTRG.11206.1	Unknown
MSTRG.112119.1	Unknown
MSTRG.112139.1	Unknown
MSTRG.112155.1	Unknown
MSTRG.112168.1	Unknown
MSTRG.112172.1	Unknown
MSTRG.112190.1	Unknown
MSTRG.112194.1	Unknown
MSTRG.112205.1	Unknown
MSTRG.112304.1	Unknown
MSTRG.112364.1	Unknown
MSTRG.11237.1	Unknown
MSTRG.11238.1	Unknown
MSTRG.112428.1	Unknown
MSTRG.112446.1	Unknown
MSTRG.112487.1	Unknown
MSTRG.112625.1	Unknown
MSTRG.112701.1	Unknown
MSTRG.112706.1	Unknown
MSTRG.112711.1	Unknown
MSTRG.112756.1	Unknown
MSTRG.112789.1	Unknown
MSTRG.11280.1	Unknown
MSTRG.112816.1	Unknown
MSTRG.112819.1	Unknown
MSTRG.112827.1	Unknown
MSTRG.112831.1	Unknown
MSTRG.112857.11	Unknown
MSTRG.11288.1	Unknown
MSTRG.112938.1	Unknown
MSTRG.113069.1	Unknown
MSTRG.11307.1	Unknown
MSTRG.113088.1	Unknown
MSTRG.113103.1	Unknown
MSTRG.113105.1	Unknown
MSTRG.113106.1	Unknown
MSTRG.113122.1	Unknown
MSTRG.113153.1	Unknown
MSTRG.113154.1	Unknown
MSTRG.113161.1	Unknown
MSTRG.113184.1	Unknown
MSTRG.113192.1	Unknown
MSTRG.113192.2	Unknown
MSTRG.113192.3	Unknown
MSTRG.113192.4	Unknown
MSTRG.113279.1	Unknown
MSTRG.113283.1	Unknown
MSTRG.113294.1	Unknown
MSTRG.113430.1	Unknown
MSTRG.113430.2	Unknown
MSTRG.113430.3	Unknown
MSTRG.113465.1	Unknown
MSTRG.113479.1	Unknown
MSTRG.113480.1	Unknown
MSTRG.113577.1	Unknown
MSTRG.113592.1	Unknown
MSTRG.113595.1	Unknown
MSTRG.113598.1	Unknown
MSTRG.113605.1	Unknown
MSTRG.113628.1	Unknown
MSTRG.113658.1	Unknown
MSTRG.113680.1	Unknown
MSTRG.113698.1	Unknown
MSTRG.113716.1	Unknown
MSTRG.113728.1	Unknown
MSTRG.113801.1	Unknown
MSTRG.113824.1	Unknown
MSTRG.113873.2	Unknown
MSTRG.113912.1	Unknown
MSTRG.113979.1	Unknown
MSTRG.113980.1	Unknown
MSTRG.113987.1	Unknown
MSTRG.113990.1	Unknown
MSTRG.114027.1	Unknown
MSTRG.114051.1	Unknown
MSTRG.114053.2	Unknown
MSTRG.114096.1	Unknown
MSTRG.114132.1	Unknown
MSTRG.114142.1	Unknown
MSTRG.114170.1	Unknown
MSTRG.114188.1	Unknown
MSTRG.114273.1	Unknown
MSTRG.114345.1	Unknown
MSTRG.114365.1	Unknown
MSTRG.114410.1	Unknown
MSTRG.114448.1	Unknown
MSTRG.114461.1	Unknown
MSTRG.114498.1	Unknown
MSTRG.114508.1	Unknown
MSTRG.114511.1	Unknown
MSTRG.114559.1	Unknown
MSTRG.114640.1	Unknown
MSTRG.114743.1	Unknown
MSTRG.114825.1	Unknown
MSTRG.114872.1	Unknown
MSTRG.114906.1	Unknown
MSTRG.114960.1	Unknown
MSTRG.115019.1	Unknown
MSTRG.115020.1	Unknown
MSTRG.115097.1	Unknown
MSTRG.115118.1	Unknown
MSTRG.115141.1	Unknown
MSTRG.115209.1	Unknown
MSTRG.11523.1	Unknown
MSTRG.115264.1	Unknown
MSTRG.115269.1	Unknown
MSTRG.115271.1	Unknown
MSTRG.115317.1	Unknown
MSTRG.115339.1	Unknown
MSTRG.115339.3	Unknown
MSTRG.115341.2	Unknown
MSTRG.115402.1	Unknown
MSTRG.115412.1	Unknown
MSTRG.115448.1	Unknown
MSTRG.11545.1	Unknown
MSTRG.115462.2	Unknown
MSTRG.115462.3	Unknown
MSTRG.115544.1	Unknown
MSTRG.115544.2	Unknown
MSTRG.115551.1	Unknown
MSTRG.115561.1	Unknown
MSTRG.115579.1	Unknown
MSTRG.115593.1	Unknown
MSTRG.115598.1	Unknown
MSTRG.1156.1	Unknown
MSTRG.115632.1	Unknown
MSTRG.115635.1	Unknown
MSTRG.115636.1	Unknown
MSTRG.115650.1	Unknown
MSTRG.11568.1	Unknown
MSTRG.115688.1	Unknown
MSTRG.115693.3	Unknown
MSTRG.115693.5	Unknown
MSTRG.115725.18	Unknown
MSTRG.115739.1	Unknown
MSTRG.115778.1	Unknown
MSTRG.115778.2	Unknown
MSTRG.115839.1	Unknown
MSTRG.115842.1	Unknown
MSTRG.115869.1	Unknown
MSTRG.115877.1	Unknown
MSTRG.1159.1	Unknown
MSTRG.115935.2	Unknown
MSTRG.115974.1	Unknown
MSTRG.116019.11	Unknown
MSTRG.116019.9	Unknown
MSTRG.11603.1	Unknown
MSTRG.116056.1	Unknown
MSTRG.116062.1	Unknown
MSTRG.116067.1	Unknown
MSTRG.116073.1	Unknown
MSTRG.116074.1	Unknown
MSTRG.116076.1	Unknown
MSTRG.116083.1	Unknown
MSTRG.116085.1	Unknown
MSTRG.11612.1	Unknown
MSTRG.11622.1	Unknown
MSTRG.116293.1	Unknown
MSTRG.116312.1	Unknown
MSTRG.116319.2	Unknown
MSTRG.116335.1	Unknown
MSTRG.116430.1	Unknown
MSTRG.116431.1	Unknown
MSTRG.116448.1	Unknown
MSTRG.116478.1	Unknown
MSTRG.11648.1	Unknown
MSTRG.116487.1	Unknown
MSTRG.116496.1	Unknown
MSTRG.116531.1	Unknown
MSTRG.116549.1	Unknown
MSTRG.116569.1	Unknown
MSTRG.116576.1	Unknown
MSTRG.116610.1	Unknown
MSTRG.116670.1	Unknown
MSTRG.116672.1	Unknown
MSTRG.11668.1	Unknown
MSTRG.116685.1	Unknown
MSTRG.11672.1	Unknown
MSTRG.116776.1	Unknown
MSTRG.116800.1	Unknown
MSTRG.116804.1	Unknown
MSTRG.116860.1	Unknown
MSTRG.116876.1	Unknown
MSTRG.11694.1	Unknown
MSTRG.116953.1	Unknown
MSTRG.11706.1	Unknown
MSTRG.117070.1	Unknown
MSTRG.117190.1	Unknown
MSTRG.117210.1	Unknown
MSTRG.117231.1	Unknown
MSTRG.117276.1	Unknown
MSTRG.117324.1	Unknown
MSTRG.117325.1	Unknown
MSTRG.11750.1	Unknown
MSTRG.117536.1	Unknown
MSTRG.117586.9	Unknown
MSTRG.117621.1	Unknown
MSTRG.117624.1	Unknown
MSTRG.117695.1	Unknown
MSTRG.117752.1	Unknown
MSTRG.117753.1	Unknown
MSTRG.117762.1	Unknown
MSTRG.117815.1	Unknown
MSTRG.117860.1	Unknown
MSTRG.117861.1	Unknown
MSTRG.117896.1	Unknown
MSTRG.117935.1	Unknown
MSTRG.117937.1	Unknown
MSTRG.117942.1	Unknown
MSTRG.117968.1	Unknown
MSTRG.117991.1	Unknown
MSTRG.118131.1	Unknown
MSTRG.118132.1	Unknown
MSTRG.118276.1	Unknown
MSTRG.118283.1	Unknown
MSTRG.118287.1	Unknown
MSTRG.11829.1	Unknown
MSTRG.118314.1	Unknown
MSTRG.118326.1	Unknown
MSTRG.118326.2	Unknown
MSTRG.118338.1	Unknown
MSTRG.118383.1	Unknown
MSTRG.118406.1	Unknown
MSTRG.118407.1	Unknown
MSTRG.118408.1	Unknown
MSTRG.118412.1	Unknown
MSTRG.118449.1	Unknown
MSTRG.118460.1	Unknown
MSTRG.118498.1	Unknown
MSTRG.118511.1	Unknown
MSTRG.118556.1	Unknown
MSTRG.118567.1	Unknown
MSTRG.118570.1	Unknown
MSTRG.118572.1	Unknown
MSTRG.11860.1	Unknown
MSTRG.118602.1	Unknown
MSTRG.118611.1	Unknown
MSTRG.118629.1	Unknown
MSTRG.118635.1	Unknown
MSTRG.118638.1	Unknown
MSTRG.118639.1	Unknown
MSTRG.118641.1	Unknown
MSTRG.118648.1	Unknown
MSTRG.118651.1	Unknown
MSTRG.118657.1	Unknown
MSTRG.118663.1	Unknown
MSTRG.1187.1	Unknown
MSTRG.118716.1	Unknown
MSTRG.118724.1	Unknown
MSTRG.118807.1	Unknown
MSTRG.118872.1	Unknown
MSTRG.118918.1	Unknown
MSTRG.118919.1	Unknown
MSTRG.118924.1	Unknown
MSTRG.118962.1	Unknown
MSTRG.118963.1	Unknown
MSTRG.118970.1	Unknown
MSTRG.118985.1	Unknown
MSTRG.119067.1	Unknown
MSTRG.119105.1	Unknown
MSTRG.119164.2	Unknown
MSTRG.119177.1	Unknown
MSTRG.119189.1	Unknown
MSTRG.119203.1	Unknown
MSTRG.119225.1	Unknown
MSTRG.119244.1	Unknown
MSTRG.119274.1	Unknown
MSTRG.119285.1	Unknown
MSTRG.119286.1	Unknown
MSTRG.119287.1	Unknown
MSTRG.119289.1	Unknown
MSTRG.119290.1	Unknown
MSTRG.119304.1	Unknown
MSTRG.119318.1	Unknown
MSTRG.119319.1	Unknown
MSTRG.119320.1	Unknown
MSTRG.119321.1	Unknown
MSTRG.119325.1	Unknown
MSTRG.119326.1	Unknown
MSTRG.119330.1	Unknown
MSTRG.119332.1	Unknown
MSTRG.119342.1	Unknown
MSTRG.119368.1	Unknown
MSTRG.119375.1	Unknown
MSTRG.119438.1	Unknown
MSTRG.119440.1	Unknown
MSTRG.119501.1	Unknown
MSTRG.119547.1	Unknown
MSTRG.119549.1	Unknown
MSTRG.119566.1	Unknown
MSTRG.119573.1	Unknown
MSTRG.119576.1	Unknown
MSTRG.119599.1	Unknown
MSTRG.119614.1	Unknown
MSTRG.119615.1	Unknown
MSTRG.119619.1	Unknown
MSTRG.119632.1	Unknown
MSTRG.119635.1	Unknown
MSTRG.119650.1	Unknown
MSTRG.119651.1	Unknown
MSTRG.119656.1	Unknown
MSTRG.119678.1	Unknown
MSTRG.119703.1	Unknown
MSTRG.119723.1	Unknown
MSTRG.119734.1	Unknown
MSTRG.119737.1	Unknown
MSTRG.119738.1	Unknown
MSTRG.119756.1	Unknown
MSTRG.119775.1	Unknown
MSTRG.119788.1	Unknown
MSTRG.119791.1	Unknown
MSTRG.11982.1	Unknown
MSTRG.119869.2	Unknown
MSTRG.119890.1	Unknown
MSTRG.119891.1	Unknown
MSTRG.119897.1	Unknown
MSTRG.119911.1	Unknown
MSTRG.119912.1	Unknown
MSTRG.119914.1	Unknown
MSTRG.119915.1	Unknown
MSTRG.119931.1	Unknown
MSTRG.119935.1	Unknown
MSTRG.119968.1	Unknown
MSTRG.120004.1	Unknown
MSTRG.120005.1	Unknown
MSTRG.120020.1	Unknown
MSTRG.120055.1	Unknown
MSTRG.120064.1	Unknown
MSTRG.120095.1	Unknown
MSTRG.120113.1	Unknown
MSTRG.120123.1	Unknown
MSTRG.120140.1	Unknown
MSTRG.120143.1	Unknown
MSTRG.120150.1	Unknown
MSTRG.120185.1	Unknown
MSTRG.120193.1	Unknown
MSTRG.120226.1	Unknown
MSTRG.120230.1	Unknown
MSTRG.120231.1	Unknown
MSTRG.120238.1	Unknown
MSTRG.120292.1	Unknown
MSTRG.120300.1	Unknown
MSTRG.120317.1	Unknown
MSTRG.120318.1	Unknown
MSTRG.120333.1	Unknown
MSTRG.120342.1	Unknown
MSTRG.120347.1	Unknown
MSTRG.120353.1	Unknown
MSTRG.120404.1	Unknown
MSTRG.120411.1	Unknown
MSTRG.120437.1	Unknown
MSTRG.120441.1	Unknown
MSTRG.120460.1	Unknown
MSTRG.120461.1	Unknown
MSTRG.120504.1	Unknown
MSTRG.120520.1	Unknown
MSTRG.120547.1	Unknown
MSTRG.120551.1	Unknown
MSTRG.120563.1	Unknown
MSTRG.120568.1	Unknown
MSTRG.120583.1	Unknown
MSTRG.120669.1	Unknown
MSTRG.120671.1	Unknown
MSTRG.12070.1	Unknown
MSTRG.120726.1	Unknown
MSTRG.120735.1	Unknown
MSTRG.120743.1	Unknown
MSTRG.120770.1	Unknown
MSTRG.120806.1	Unknown
MSTRG.120812.1	Unknown
MSTRG.120823.1	Unknown
MSTRG.120826.1	Unknown
MSTRG.120832.1	Unknown
MSTRG.120858.1	Unknown
MSTRG.120864.1	Unknown
MSTRG.120870.1	Unknown
MSTRG.120877.1	Unknown
MSTRG.120889.1	Unknown
MSTRG.120931.1	Unknown
MSTRG.120944.1	Unknown
MSTRG.120948.1	Unknown
MSTRG.120949.1	Unknown
MSTRG.120958.1	Unknown
MSTRG.120965.1	Unknown
MSTRG.120979.1	Unknown
MSTRG.120981.1	Unknown
MSTRG.120994.1	Unknown
MSTRG.121003.1	Unknown
MSTRG.121004.1	Unknown
MSTRG.121005.1	Unknown
MSTRG.121008.1	Unknown
MSTRG.121021.2	Unknown
MSTRG.121033.1	Unknown
MSTRG.121034.1	Unknown
MSTRG.121046.1	Unknown
MSTRG.121055.1	Unknown
MSTRG.121063.1	Unknown
MSTRG.121067.1	Unknown
MSTRG.121068.1	Unknown
MSTRG.121070.1	Unknown
MSTRG.121073.1	Unknown
MSTRG.121118.1	Unknown
MSTRG.121142.1	Unknown
MSTRG.121143.1	Unknown
MSTRG.121158.1	Unknown
MSTRG.121162.1	Unknown
MSTRG.121190.1	Unknown
MSTRG.121230.1	Unknown
MSTRG.121241.1	Unknown
MSTRG.121275.1	Unknown
MSTRG.121279.1	Unknown
MSTRG.121299.1	Unknown
MSTRG.121329.1	Unknown
MSTRG.121354.1	Unknown
MSTRG.121382.1	Unknown
MSTRG.121420.1	Unknown
MSTRG.121435.1	Unknown
MSTRG.121500.1	Unknown
MSTRG.121553.1	Unknown
MSTRG.121609.1	Unknown
MSTRG.121615.1	Unknown
MSTRG.121646.1	Unknown
MSTRG.121647.1	Unknown
MSTRG.121664.1	Unknown
MSTRG.121671.1	Unknown
MSTRG.121671.2	Unknown
MSTRG.121698.1	Unknown
MSTRG.121715.1	Unknown
MSTRG.121719.1	Unknown
MSTRG.121766.1	Unknown
MSTRG.121863.1	Unknown
MSTRG.121887.1	Unknown
MSTRG.121897.1	Unknown
MSTRG.121903.1	Unknown
MSTRG.121915.1	Unknown
MSTRG.121924.1	Unknown
MSTRG.121931.1	Unknown
MSTRG.121932.1	Unknown
MSTRG.121948.1	Unknown
MSTRG.121949.1	Unknown
MSTRG.121998.1	Unknown
MSTRG.122008.1	Unknown
MSTRG.122065.1	Unknown
MSTRG.122067.1	Unknown
MSTRG.122070.1	Unknown
MSTRG.122089.1	Unknown
MSTRG.122090.5	Unknown
MSTRG.122101.1	Unknown
MSTRG.122122.1	Unknown
MSTRG.122131.1	Unknown
MSTRG.122143.1	Unknown
MSTRG.122150.1	Unknown
MSTRG.122154.1	Unknown
MSTRG.12216.1	Unknown
MSTRG.122165.1	Unknown
MSTRG.122181.2	Unknown
MSTRG.122193.1	Unknown
MSTRG.122194.1	Unknown
MSTRG.122244.1	Unknown
MSTRG.122252.1	Unknown
MSTRG.122278.1	Unknown
MSTRG.122281.1	Unknown
MSTRG.122297.1	Unknown
MSTRG.122335.1	Unknown
MSTRG.122380.1	Unknown
MSTRG.122383.1	Unknown
MSTRG.122400.1	Unknown
MSTRG.122405.1	Unknown
MSTRG.122509.1	Unknown
MSTRG.122518.1	Unknown
MSTRG.122524.1	Unknown
MSTRG.122528.1	Unknown
MSTRG.122533.1	Unknown
MSTRG.122542.1	Unknown
MSTRG.122661.1	Unknown
MSTRG.122711.1	Unknown
MSTRG.122713.2	Unknown
MSTRG.122714.1	Unknown
MSTRG.122718.1	Unknown
MSTRG.122719.1	Unknown
MSTRG.122729.1	Unknown
MSTRG.122731.1	Unknown
MSTRG.122732.1	Unknown
MSTRG.122733.1	Unknown
MSTRG.122754.1	Unknown
MSTRG.122797.1	Unknown
MSTRG.122822.1	Unknown
MSTRG.12283.1	Unknown
MSTRG.122899.1	Unknown
MSTRG.122903.1	Unknown
MSTRG.122908.1	Unknown
MSTRG.122909.1	Unknown
MSTRG.122930.1	Unknown
MSTRG.122951.1	Unknown
MSTRG.122984.1	Unknown
MSTRG.122988.1	Unknown
MSTRG.123008.1	Unknown
MSTRG.123022.1	Unknown
MSTRG.123028.1	Unknown
MSTRG.123049.1	Unknown
MSTRG.123060.1	Unknown
MSTRG.123067.1	Unknown
MSTRG.123080.1	Unknown
MSTRG.123093.1	Unknown
MSTRG.123118.1	Unknown
MSTRG.123134.1	Unknown
MSTRG.123135.1	Unknown
MSTRG.123173.1	Unknown
MSTRG.123193.1	Unknown
MSTRG.123195.1	Unknown
MSTRG.123196.1	Unknown
MSTRG.123198.1	Unknown
MSTRG.123201.1	Unknown
MSTRG.123227.1	Unknown
MSTRG.123231.1	Unknown
MSTRG.123236.1	Unknown
MSTRG.123272.1	Unknown
MSTRG.123284.1	Unknown
MSTRG.123286.1	Unknown
MSTRG.123363.1	Unknown
MSTRG.12344.1	Unknown
MSTRG.123505.1	Unknown
MSTRG.123566.1	Unknown
MSTRG.123568.1	Unknown
MSTRG.123603.1	Unknown
MSTRG.123604.1	Unknown
MSTRG.123626.1	Unknown
MSTRG.123633.1	Unknown
MSTRG.123639.1	Unknown
MSTRG.123671.1	Unknown
MSTRG.123680.1	Unknown
MSTRG.123681.1	Unknown
MSTRG.123683.1	Unknown
MSTRG.123686.1	Unknown
MSTRG.123688.1	Unknown
MSTRG.123691.1	Unknown
MSTRG.123761.1	Unknown
MSTRG.123762.1	Unknown
MSTRG.123771.1	Unknown
MSTRG.123780.1	Unknown
MSTRG.123782.1	Unknown
MSTRG.123783.1	Unknown
MSTRG.123789.1	Unknown
MSTRG.123790.1	Unknown
MSTRG.123803.1	Unknown
MSTRG.123818.1	Unknown
MSTRG.123845.1	Unknown
MSTRG.123858.1	Unknown
MSTRG.12388.1	Unknown
MSTRG.123901.1	Unknown
MSTRG.123913.1	Unknown
MSTRG.123941.1	Unknown
MSTRG.123946.1	Unknown
MSTRG.123966.1	Unknown
MSTRG.123977.1	Unknown
MSTRG.123991.1	Unknown
MSTRG.124020.1	Unknown
MSTRG.124025.1	Unknown
MSTRG.124027.1	Unknown
MSTRG.124028.1	Unknown
MSTRG.124029.1	Unknown
MSTRG.124031.1	Unknown
MSTRG.124036.1	Unknown
MSTRG.124038.1	Unknown
MSTRG.124039.1	Unknown
MSTRG.124042.1	Unknown
MSTRG.124110.1	Unknown
MSTRG.124112.1	Unknown
MSTRG.124113.1	Unknown
MSTRG.12414.1	Unknown
MSTRG.124148.1	Unknown
MSTRG.124153.1	Unknown
MSTRG.124186.1	Unknown
MSTRG.124204.1	Unknown
MSTRG.124216.1	Unknown
MSTRG.124229.1	Unknown
MSTRG.124279.1	Unknown
MSTRG.124291.1	Unknown
MSTRG.124293.1	Unknown
MSTRG.124319.1	Unknown
MSTRG.124324.1	Unknown
MSTRG.124356.1	Unknown
MSTRG.124358.1	Unknown
MSTRG.124378.1	Unknown
MSTRG.124401.1	Unknown
MSTRG.124409.1	Unknown
MSTRG.124433.1	Unknown
MSTRG.124446.1	Unknown
MSTRG.124510.1	Unknown
MSTRG.124511.1	Unknown
MSTRG.124513.1	Unknown
MSTRG.124518.2	Unknown
MSTRG.124676.1	Unknown
MSTRG.124693.1	Unknown
MSTRG.124702.1	Unknown
MSTRG.124703.1	Unknown
MSTRG.124718.1	Unknown
MSTRG.124727.1	Unknown
MSTRG.124736.1	Unknown
MSTRG.124849.1	Unknown
MSTRG.124878.1	Unknown
MSTRG.124881.1	Unknown
MSTRG.124893.1	Unknown
MSTRG.124896.1	Unknown
MSTRG.124909.1	Unknown
MSTRG.124917.1	Unknown
MSTRG.124918.1	Unknown
MSTRG.124921.1	Unknown
MSTRG.124925.1	Unknown
MSTRG.124927.1	Unknown
MSTRG.124936.1	Unknown
MSTRG.124945.1	Unknown
MSTRG.124950.1	Unknown
MSTRG.124952.1	Unknown
MSTRG.124961.1	Unknown
MSTRG.124977.1	Unknown
MSTRG.125032.1	Unknown
MSTRG.125033.1	Unknown
MSTRG.125040.1	Unknown
MSTRG.125046.1	Unknown
MSTRG.125081.1	Unknown
MSTRG.125085.1	Unknown
MSTRG.12509.1	Unknown
MSTRG.12510.1	Unknown
MSTRG.125102.1	Unknown
MSTRG.125119.1	Unknown
MSTRG.125141.1	Unknown
MSTRG.125147.1	Unknown
MSTRG.125160.1	Unknown
MSTRG.125198.1	Unknown
MSTRG.125216.1	Unknown
MSTRG.125224.1	Unknown
MSTRG.125254.1	Unknown
MSTRG.125254.2	Unknown
MSTRG.125300.1	Unknown
MSTRG.125305.1	Unknown
MSTRG.125361.1	Unknown
MSTRG.125400.1	Unknown
MSTRG.125463.1	Unknown
MSTRG.125467.1	Unknown
MSTRG.125535.1	Unknown
MSTRG.125564.1	Unknown
MSTRG.125671.1	Unknown
MSTRG.125676.1	Unknown
MSTRG.125737.1	Unknown
MSTRG.125740.1	Unknown
MSTRG.125769.1	Unknown
MSTRG.125786.1	Unknown
MSTRG.125786.2	Unknown
MSTRG.125825.1	Unknown
MSTRG.125871.1	Unknown
MSTRG.125880.1	Unknown
MSTRG.125898.1	Unknown
MSTRG.125904.1	Unknown
MSTRG.125924.1	Unknown
MSTRG.125961.1	Unknown
MSTRG.125981.1	Unknown
MSTRG.126000.1	Unknown
MSTRG.126001.1	Unknown
MSTRG.126027.1	Unknown
MSTRG.126039.1	Unknown
MSTRG.126069.1	Unknown
MSTRG.126098.1	Unknown
MSTRG.126103.1	Unknown
MSTRG.126171.1	Unknown
MSTRG.126178.1	Unknown
MSTRG.126200.1	Unknown
MSTRG.126218.1	Unknown
MSTRG.126240.1	Unknown
MSTRG.126242.1	Unknown
MSTRG.126298.1	Unknown
MSTRG.126312.1	Unknown
MSTRG.126339.1	Unknown
MSTRG.126341.1	Unknown
MSTRG.126364.1	Unknown
MSTRG.126370.1	Unknown
MSTRG.126371.1	Unknown
MSTRG.126470.1	Unknown
MSTRG.126509.1	Unknown
MSTRG.126535.1	Unknown
MSTRG.126558.1	Unknown
MSTRG.126589.1	Unknown
MSTRG.126611.1	Unknown
MSTRG.126616.1	Unknown
MSTRG.126635.1	Unknown
MSTRG.126635.2	Unknown
MSTRG.126655.1	Unknown
MSTRG.12668.1	Unknown
MSTRG.126684.1	Unknown
MSTRG.126690.1	Unknown
MSTRG.126692.1	Unknown
MSTRG.126693.1	Unknown
MSTRG.126697.1	Unknown
MSTRG.126698.1	Unknown
MSTRG.126704.1	Unknown
MSTRG.126715.1	Unknown
MSTRG.126725.1	Unknown
MSTRG.126755.1	Unknown
MSTRG.126760.1	Unknown
MSTRG.126763.1	Unknown
MSTRG.126797.1	Unknown
MSTRG.126806.1	Unknown
MSTRG.126863.1	Unknown
MSTRG.126872.1	Unknown
MSTRG.126898.1	Unknown
MSTRG.126917.1	Unknown
MSTRG.126941.1	Unknown
[truncated: 2,821 more rows]
